# Supplementary material for: HIGD1B, as a novel prognostic biomarker, is involved in regulating the tumor microenvironment and immune cell infiltration; its overexpression leads to poor prognosis in gastric cancer patients
Source: Front Immunol. 2024 Jul 23;15:1415148. doi: 10.3389/fimmu.2024.1415148 (PMC11300267; doi:10.3389/fimmu.2024.1415148)
Supplement: Supplementary file 1 [file Table_1.xlsx]

## Sheet: TCGA-STAD
ID	HIGD1B
TCGA-3M-AB46-01A-11R-A414-31	0.9065
TCGA-3M-AB47-01A-22R-A414-31	3.4103
TCGA-B7-5816-01A-21R-1602-13	1.8647
TCGA-B7-5818-01A-11R-1602-13	2.0438
TCGA-B7-A5TI-01A-11R-A31P-31	4.9103
TCGA-B7-A5TJ-01A-11R-A31P-31	1.7047
TCGA-B7-A5TK-01A-12R-A36D-31	1.7344
TCGA-B7-A5TN-01A-21R-A31P-31	3.5639
TCGA-BR-4187-01A-01R-1131-13	3.5535
TCGA-BR-4191-01A-02R-1131-13	4.5534
TCGA-BR-4201-01A-01R-1131-13	2.4408
TCGA-BR-4253-01A-01R-1131-13	1.4902
TCGA-BR-4255-01A-01R-1131-13	5.3726
TCGA-BR-4256-01A-01R-1131-13	2.1345
TCGA-BR-4257-01A-01R-1131-13	1.1863
TCGA-BR-4267-01A-01R-1131-13	1.4085
TCGA-BR-4279-01A-01R-1131-13	5.3983
TCGA-BR-4280-01A-01R-1131-13	0.6374
TCGA-BR-4292-01A-01R-1131-13	0.9893
TCGA-BR-4294-01A-01R-1131-13	1.0746
TCGA-BR-4357-01A-01R-1157-13	1.2734
TCGA-BR-4361-01A-01R-1157-13	2.0095
TCGA-BR-4363-01A-01R-1157-13	2.5179
TCGA-BR-4366-01A-01R-1157-13	3.0178
TCGA-BR-4367-01A-01R-1157-13	0.8376
TCGA-BR-4368-01A-01R-1157-13	2.2597
TCGA-BR-4369-01A-01R-1157-13	2.4293
TCGA-BR-4370-01A-01R-1157-13	1.8155
TCGA-BR-4371-01A-01R-1157-13	1.6341
TCGA-BR-6452-01A-12R-1802-13	1.4368
TCGA-BR-6453-01A-11R-1802-13	3.8538
TCGA-BR-6453-11A-01R-1802-13	0.6099
TCGA-BR-6454-01A-11R-1802-13	2.7321
TCGA-BR-6454-11A-01R-1802-13	0.5943
TCGA-BR-6455-01A-11R-1802-13	2.4027
TCGA-BR-6456-01A-11R-1802-13	1.6918
TCGA-BR-6457-01A-21R-1802-13	3.1822
TCGA-BR-6457-11A-01R-1802-13	0.7301
TCGA-BR-6458-01A-11R-1802-13	1.9146
TCGA-BR-6458-11A-01R-1802-13	0.5482
TCGA-BR-6563-01A-13R-2055-13	2.5277
TCGA-BR-6564-01A-12R-1884-13	2.2599
TCGA-BR-6564-11A-01R-1884-13	0.8623
TCGA-BR-6565-01A-11R-1802-13	0.6145
TCGA-BR-6566-01A-11R-1802-13	1.4917
TCGA-BR-6705-01A-12R-1884-13	6.3201
TCGA-BR-6706-01A-11R-1884-13	2.0285
TCGA-BR-6707-01A-11R-1884-13	3.6119
TCGA-BR-6709-01A-11R-1884-13	3.102
TCGA-BR-6710-01A-11R-1884-13	0.3843
TCGA-BR-6801-01A-11R-1884-13	1.2167
TCGA-BR-6802-01A-11R-1884-13	0.9928
TCGA-BR-6802-11A-01R-1884-13	1.0453
TCGA-BR-6803-01A-11R-1884-13	3.4483
TCGA-BR-6852-01A-11R-1884-13	2.2089
TCGA-BR-6852-11A-01R-1884-13	1.6105
TCGA-BR-7196-01A-11R-2055-13	3.5218
TCGA-BR-7197-01A-11R-2203-13	2.9161
TCGA-BR-7703-01A-11R-2055-13	1.5039
TCGA-BR-7703-11A-01R-2055-13	1.7192
TCGA-BR-7704-01A-11R-2055-13	1.6346
TCGA-BR-7704-11A-01R-2055-13	1.325
TCGA-BR-7707-01A-11R-2055-13	2.5148
TCGA-BR-7715-01A-11R-2055-13	3.413
TCGA-BR-7715-11A-01R-2055-13	1.6189
TCGA-BR-7716-01A-21R-2055-13	1.4074
TCGA-BR-7716-11A-01R-2055-13	0.7887
TCGA-BR-7717-01A-11R-2055-13	2.7573
TCGA-BR-7717-11A-01R-2055-13	1.2452
TCGA-BR-7722-01A-31R-2203-13	0.7164
TCGA-BR-7723-01A-11R-2055-13	1.1456
TCGA-BR-7851-01A-11R-2203-13	2.4916
TCGA-BR-7851-11A-01R-2203-13	0.4762
TCGA-BR-7901-01A-11R-2203-13	4.4974
TCGA-BR-7957-01A-11R-2203-13	4.7114
TCGA-BR-7958-01A-21R-2343-13	2.2829
TCGA-BR-7959-01A-11R-2343-13	4.2161
TCGA-BR-8058-01A-31R-2343-13	3.2547
TCGA-BR-8059-01A-11R-2343-13	3.9302
TCGA-BR-8060-01A-11R-2343-13	2.9048
TCGA-BR-8060-11A-01R-2343-13	1.7005
TCGA-BR-8077-01A-11R-2343-13	2.975
TCGA-BR-8078-01A-11R-2343-13	3.1502
TCGA-BR-8080-01A-11R-2343-13	3.118
TCGA-BR-8081-01A-11R-2343-13	1.1006
TCGA-BR-8284-01A-11R-2343-13	4.1088
TCGA-BR-8286-01A-12R-2343-13	1.7508
TCGA-BR-8289-01A-11R-2343-13	2.7454
TCGA-BR-8291-01A-11R-2343-13	2.6878
TCGA-BR-8295-01A-11R-2343-13	2.5705
TCGA-BR-8296-01A-11R-2343-13	3.4028
TCGA-BR-8297-01A-12R-2343-13	2.1617
TCGA-BR-8361-01A-11R-2343-13	2.5371
TCGA-BR-8362-01A-11R-2343-13	2.3919
TCGA-BR-8363-01A-11R-2343-13	2.9293
TCGA-BR-8364-01A-11R-2343-13	5.8897
TCGA-BR-8365-01A-21R-2343-13	3.6847
TCGA-BR-8366-01A-11R-2343-13	1.6453
TCGA-BR-8367-01A-11R-2343-13	2.8724
TCGA-BR-8368-01A-11R-2343-13	1.2237
TCGA-BR-8369-01A-11R-2343-13	5.4958
TCGA-BR-8371-01A-11R-2343-13	1.7357
TCGA-BR-8372-01A-11R-2343-13	1.8846
TCGA-BR-8373-01A-11R-2343-13	3.5066
TCGA-BR-8380-01A-11R-2343-13	2.3806
TCGA-BR-8381-01A-11R-2402-13	3.0583
TCGA-BR-8382-01A-11R-2402-13	1.1054
TCGA-BR-8384-01A-21R-2402-13	3.3769
TCGA-BR-8483-01A-31R-2402-13	2.5678
TCGA-BR-8484-01A-11R-2402-13	2.5824
TCGA-BR-8485-01A-11R-2402-13	1.691
TCGA-BR-8486-01A-31R-2402-13	3.7432
TCGA-BR-8487-01A-11R-2402-13	1.6429
TCGA-BR-8588-01A-11R-2402-13	1.0954
TCGA-BR-8589-01A-11R-2402-13	2.1172
TCGA-BR-8590-01A-11R-2402-13	2.678
TCGA-BR-8591-01A-11R-2402-13	2.7281
TCGA-BR-8592-01A-11R-2402-13	3.245
TCGA-BR-8676-01A-11R-2402-13	0.4832
TCGA-BR-8677-01A-11R-2402-13	3.5359
TCGA-BR-8678-01A-11R-2402-13	2.2332
TCGA-BR-8679-01A-11R-2402-13	2.2417
TCGA-BR-8680-01A-11R-2402-13	4.4519
TCGA-BR-8682-01A-11R-2402-13	1.9543
TCGA-BR-8683-01A-11R-2402-13	5.7502
TCGA-BR-8686-01A-11R-2402-13	1.9785
TCGA-BR-8687-01A-11R-2402-13	1.1335
TCGA-BR-8690-01A-11R-2402-13	1.0338
TCGA-BR-A44T-01A-32R-A24K-31	2.2749
TCGA-BR-A44U-01A-11R-A36D-31	0.3956
TCGA-BR-A452-01A-91R-A251-31	1.6338
TCGA-BR-A453-01A-11R-A24K-31	3.2728
TCGA-BR-A4CR-01A-11R-A24K-31	2.6168
TCGA-BR-A4CS-01A-11R-A24K-31	4.1627
TCGA-BR-A4IU-01A-22R-A251-31	3.7942
TCGA-BR-A4IV-01A-31R-A251-31	2.5654
TCGA-BR-A4IY-01A-11R-A251-31	1.6849
TCGA-BR-A4IZ-01A-32R-A251-31	7.9203
TCGA-BR-A4J1-01A-11R-A251-31	0.7844
TCGA-BR-A4J2-01A-21R-A251-31	3.0276
TCGA-BR-A4J4-01A-12R-A251-31	2.067
TCGA-BR-A4J5-01A-21R-A251-31	3.0891
TCGA-BR-A4J6-01A-11R-A251-31	1.8825
TCGA-BR-A4J7-01A-31R-A251-31	3.3747
TCGA-BR-A4J8-01A-11R-A251-31	3.6995
TCGA-BR-A4J9-01A-12R-A251-31	2.5034
TCGA-BR-A4PD-01A-11R-A251-31	1.7848
TCGA-BR-A4PE-01A-31R-A251-31	1.018
TCGA-BR-A4PF-01A-11R-A251-31	1.1676
TCGA-BR-A4QI-01A-12R-A251-31	5.8124
TCGA-BR-A4QL-01A-31R-A251-31	0.9835
TCGA-BR-A4QM-01A-12R-A251-31	0.9474
TCGA-CD-5798-01A-11R-1602-13	2.7989
TCGA-CD-5799-01A-11R-1602-13	1.6058
TCGA-CD-5800-01A-11R-1602-13	1.4156
TCGA-CD-5801-01A-11R-1602-13	1.1437
TCGA-CD-5803-01A-11R-1602-13	4.3587
TCGA-CD-5804-01A-12R-2055-13	3.9488
TCGA-CD-5813-01A-11R-1602-13	4.3385
TCGA-CD-8524-01A-11R-2343-13	3.702
TCGA-CD-8525-01A-11R-2343-13	5.0597
TCGA-CD-8526-01A-11R-2343-13	2.3293
TCGA-CD-8527-01A-11R-2343-13	0.9565
TCGA-CD-8528-01A-11R-2343-13	1.493
TCGA-CD-8529-01A-11R-2343-13	2.3937
TCGA-CD-8530-01A-11R-2343-13	4.6076
TCGA-CD-8531-01A-11R-2343-13	1.6187
TCGA-CD-8532-01A-11R-2343-13	2.1908
TCGA-CD-8533-01A-11R-2343-13	2.1381
TCGA-CD-8534-01A-11R-2343-13	3.4065
TCGA-CD-8535-01A-11R-2343-13	3.8697
TCGA-CD-8536-01A-11R-2343-13	0.5082
TCGA-CD-A486-01A-11R-A24K-31	2.6786
TCGA-CD-A487-01A-21R-A24K-31	1.9472
TCGA-CD-A489-01A-11R-A24K-31	3.2955
TCGA-CD-A48A-01A-12R-A36D-31	1.697
TCGA-CD-A48C-01A-11R-A24K-31	1.2566
TCGA-CD-A4MG-01A-11R-A251-31	2.2517
TCGA-CD-A4MH-01A-11R-A251-31	1.0934
TCGA-CD-A4MI-01A-21R-A251-31	2.8207
TCGA-CD-A4MJ-01A-11R-A251-31	1.2793
TCGA-CG-4301-01A-01R-1157-13	3.7595
TCGA-CG-4304-01A-01R-1157-13	1.1924
TCGA-CG-4305-01A-01R-1157-13	1.9577
TCGA-CG-4306-01A-01R-1157-13	1.6048
TCGA-CG-4436-01A-01R-1157-13	0.5565
TCGA-CG-4437-01A-01R-1802-13	1.6435
TCGA-CG-4438-01A-01R-1157-13	3.0249
TCGA-CG-4440-01A-01R-1157-13	1.5218
TCGA-CG-4441-01A-01R-1802-13	1.8807
TCGA-CG-4442-01A-01R-1157-13	1.2847
TCGA-CG-4443-01A-01R-1157-13	0.58
TCGA-CG-4444-01A-01R-1157-13	1.3735
TCGA-CG-4460-01A-01R-1157-13	1.6827
TCGA-CG-4462-01A-01R-1157-13	5.3868
TCGA-CG-4465-01A-01R-1157-13	0.9983
TCGA-CG-4466-01A-01R-1157-13	1.8074
TCGA-CG-4469-01A-01R-1157-13	2.3198
TCGA-CG-4475-01A-01R-1157-13	5.5563
TCGA-CG-4476-01A-01R-1157-13	2.7708
TCGA-CG-4477-01A-01R-1157-13	2.1951
TCGA-CG-5716-01A-21R-1802-13	0.9388
TCGA-CG-5717-01A-11R-1602-13	2.7252
TCGA-CG-5718-01A-11R-1602-13	1.6781
TCGA-CG-5719-01A-11R-1602-13	6.9686
TCGA-CG-5720-01A-11R-1602-13	1.2668
TCGA-CG-5720-11A-01R-1602-13	0.9874
TCGA-CG-5721-01A-11R-1602-13	1.8952
TCGA-CG-5721-11A-01R-1602-13	0.6908
TCGA-CG-5722-01A-21R-1602-13	2.5926
TCGA-CG-5722-11A-02R-1602-13	0.6607
TCGA-CG-5723-01A-11R-1602-13	1.3921
TCGA-CG-5724-01A-11R-1602-13	4.5517
TCGA-CG-5725-01A-11R-1602-13	3.5401
TCGA-CG-5726-01A-11R-1602-13	1.4631
TCGA-CG-5728-11A-01R-1602-13	0.8179
TCGA-CG-5730-11A-01R-1602-13	0.3788
TCGA-CG-5732-01A-11R-1602-13	0.7105
TCGA-CG-5733-11A-01R-1602-13	0.6033
TCGA-CG-5734-01A-11R-1602-13	0.7844
TCGA-CG-5734-11A-01R-1602-13	0.9494
TCGA-D7-5577-01A-01R-1602-13	0.6729
TCGA-D7-5578-01A-01R-1602-13	3.0336
TCGA-D7-6518-01A-11R-1802-13	4.1782
TCGA-D7-6519-01A-11R-1802-13	1.1538
TCGA-D7-6520-01A-11R-1802-13	2.6016
TCGA-D7-6521-01A-11R-1802-13	1.961
TCGA-D7-6522-01A-11R-1802-13	2.7222
TCGA-D7-6524-01A-11R-1802-13	4.9946
TCGA-D7-6525-01A-11R-1802-13	1.322
TCGA-D7-6526-01A-11R-1802-13	0.7131
TCGA-D7-6527-01A-11R-1802-13	2.6926
TCGA-D7-6528-01A-11R-1802-13	1.3515
TCGA-D7-6815-01A-11R-1884-13	2.8375
TCGA-D7-6817-01A-11R-1884-13	2.8323
TCGA-D7-6818-01A-11R-1884-13	3.0257
TCGA-D7-6820-01A-11R-1884-13	2.674
TCGA-D7-6822-01A-11R-1884-13	1.981
TCGA-D7-8570-01A-11R-2343-13	1.8919
TCGA-D7-8572-01A-11R-2343-13	3.524
TCGA-D7-8573-01A-11R-2343-13	2.7824
TCGA-D7-8574-01A-13R-2343-13	2.4299
TCGA-D7-8575-01A-11R-2343-13	2.8152
TCGA-D7-8576-01A-11R-2343-13	2.7942
TCGA-D7-8578-01A-21R-2343-13	2.3406
TCGA-D7-8579-01A-11R-2343-13	2.9607
TCGA-D7-A4YT-01A-11R-A251-31	5.1567
TCGA-D7-A4YU-01A-21R-A251-31	3.3961
TCGA-D7-A4YV-01A-11R-A251-31	1.9741
TCGA-D7-A4YX-01A-11R-A251-31	2.8315
TCGA-D7-A4YY-01A-11R-A251-31	1.1048
TCGA-D7-A4Z0-01A-22R-A251-31	2.3107
TCGA-D7-A6EV-01A-11R-A31P-31	0.3562
TCGA-D7-A6EX-01A-11R-A31P-31	1.2598
TCGA-D7-A6EY-01A-21R-A31P-31	2.0565
TCGA-D7-A6EZ-01A-11R-A31P-31	2.0568
TCGA-D7-A6F0-01A-11R-A31P-31	1.5398
TCGA-D7-A6F2-01A-12R-A31P-31	0.8993
TCGA-D7-A747-01A-22R-A33Y-31	0.8849
TCGA-D7-A748-01A-12R-A32D-31	3.4277
TCGA-D7-A74A-01A-11R-A32D-31	1.1473
TCGA-EQ-8122-01A-11R-2343-13	3.1831
TCGA-EQ-A4SO-01A-11R-A251-31	1.1372
TCGA-F1-6177-01A-11R-1802-13	1.3211
TCGA-F1-6874-01A-11R-1884-13	1.9556
TCGA-F1-6875-01A-11R-2055-13	0.8994
TCGA-F1-A448-01A-11R-A24K-31	1.8309
TCGA-F1-A72C-01A-21R-A33Y-31	2.9854
TCGA-FP-7735-01A-11R-2055-13	3.1077
TCGA-FP-7735-11A-01R-2055-13	1.934
TCGA-FP-7829-01A-11R-2055-13	1.912
TCGA-FP-7829-11A-01R-2055-13	2.936
TCGA-FP-7916-01A-11R-2203-13	4.29
TCGA-FP-7998-01A-11R-2203-13	2.1321
TCGA-FP-8099-01A-11R-2343-13	1.845
TCGA-FP-8209-01A-11R-2343-13	2.79
TCGA-FP-8210-01A-11R-2343-13	3.5889
TCGA-FP-8211-01A-11R-2343-13	1.2511
TCGA-FP-8631-01A-11R-2402-13	3.8477
TCGA-FP-A4BE-01A-12R-A24K-31	1.9024
TCGA-FP-A4BF-01A-12R-A36D-31	3.2563
TCGA-FP-A8CX-01A-11R-A36D-31	0.8515
TCGA-FP-A9TM-01A-11R-A39E-31	1.883
TCGA-HF-7131-01A-11R-2055-13	1.1012
TCGA-HF-7132-01A-11R-2055-13	1.1486
TCGA-HF-7133-01A-11R-2055-13	2.9899
TCGA-HF-7134-01A-11R-2055-13	1.4742
TCGA-HF-7136-01A-11R-2055-13	0.8519
TCGA-HF-A5NB-01A-11R-A31P-31	1.7478
TCGA-HJ-7597-01A-21R-2203-13	2.6656
TCGA-HU-8238-01A-11R-2343-13	1.1686
TCGA-HU-8238-11A-01R-2343-13	0.3867
TCGA-HU-8243-01A-11R-2343-13	3.1117
TCGA-HU-8244-01A-11R-2343-13	0.858
TCGA-HU-8249-01A-11R-A36D-31	0.7245
TCGA-HU-8602-01A-11R-2402-13	2.1989
TCGA-HU-8604-01A-11R-2402-13	1.1537
TCGA-HU-8608-01A-11R-2402-13	1.3288
TCGA-HU-8610-01A-22R-2402-13	1.7341
TCGA-HU-A4G2-01A-11R-A251-31	1.6616
TCGA-HU-A4G3-01A-11R-A24K-31	1.3805
TCGA-HU-A4G6-01A-11R-A24K-31	1.2378
TCGA-HU-A4G8-01A-11R-A251-31	1.9411
TCGA-HU-A4G9-01A-11R-A24K-31	0.7293
TCGA-HU-A4GC-01A-12R-A251-31	1.7649
TCGA-HU-A4GC-11A-11R-A251-31	2.948
TCGA-HU-A4GD-01A-11R-A36D-31	3.2735
TCGA-HU-A4GF-01A-11R-A24K-31	0.7046
TCGA-HU-A4GH-01A-11R-A24K-31	0.9902
TCGA-HU-A4GH-11A-11R-A36D-31	2.4712
TCGA-HU-A4GJ-01A-11R-A251-31	2.3082
TCGA-HU-A4GN-01A-11R-A251-31	1.7195
TCGA-HU-A4GN-11A-12R-A251-31	1.0629
TCGA-HU-A4GP-01A-11R-A251-31	1.0722
TCGA-HU-A4GP-11A-21R-A251-31	2.8438
TCGA-HU-A4GQ-01A-11R-A36D-31	1.336
TCGA-HU-A4GT-01A-21R-A251-31	0.7813
TCGA-HU-A4GU-01A-11R-A251-31	0.6341
TCGA-HU-A4GX-01A-12R-A251-31	1.0647
TCGA-HU-A4GY-01A-21R-A24K-31	3.0046
TCGA-HU-A4GY-11A-11R-A36D-31	3.2275
TCGA-HU-A4H0-01A-11R-A251-31	1.6403
TCGA-HU-A4H2-01A-11R-A251-31	0.5347
TCGA-HU-A4H3-01A-21R-A251-31	1.1396
TCGA-HU-A4H4-01A-21R-A251-31	1.6456
TCGA-HU-A4H5-01A-21R-A251-31	0.8411
TCGA-HU-A4H6-01A-11R-A251-31	1.6037
TCGA-HU-A4H8-01A-11R-A251-31	1.5376
TCGA-HU-A4HB-01A-12R-A251-31	1.0192
TCGA-HU-A4HB-11A-11R-A251-31	1.8593
TCGA-HU-A4HD-01A-11R-A251-31	0.5804
TCGA-IN-7806-01A-11R-2055-13	3.056
TCGA-IN-7806-11A-01R-2055-13	1.0971
TCGA-IN-7808-01A-11R-2203-13	1.0782
TCGA-IN-8462-01A-11R-2343-13	2.1318
TCGA-IN-8462-11A-01R-2343-13	2.2626
TCGA-IN-8663-01A-11R-2402-13	1.9147
TCGA-IN-8663-11A-01R-2402-13	1.7487
TCGA-IN-A6RI-01A-11R-A32D-31	2.1563
TCGA-IN-A6RJ-01A-21R-A33Y-31	0.9221
TCGA-IN-A6RL-01A-11R-A32D-31	1.7381
TCGA-IN-A6RN-01A-12R-A33Y-31	2.0172
TCGA-IN-A6RO-01A-12R-A33Y-31	1.8019
TCGA-IN-A6RR-01A-12R-A32D-31	1.1291
TCGA-IN-A6RS-01A-12R-A354-31	1.3438
TCGA-IN-A7NR-01A-11R-A354-31	1.5848
TCGA-IN-A7NT-01A-21R-A354-31	1.3616
TCGA-IN-A7NU-01A-22R-A354-31	1.1151
TCGA-IN-AB1V-01A-21R-A414-31	0.8567
TCGA-IN-AB1V-11A-11R-A414-31	1.2474
TCGA-IN-AB1X-01A-11R-A39E-31	1.3727
TCGA-IN-AB1X-11A-21R-A39E-31	1.3831
TCGA-IP-7968-01A-11R-2203-13	3.8716
TCGA-IP-7968-11A-01R-2203-13	0.5448
TCGA-KB-A6F7-01A-12R-A32D-31	0.4211
TCGA-KB-A93G-01A-11R-A39E-31	4.0112
TCGA-KB-A93H-01A-11R-A39E-31	0.8992
TCGA-KB-A93J-01A-11R-A39E-31	2.3997
TCGA-MX-A5UG-01A-21R-A31P-31	2.8387
TCGA-MX-A5UJ-01A-11R-A31P-31	3.0688
TCGA-MX-A663-01A-11R-A31P-31	3.33
TCGA-MX-A666-01A-11R-A31P-31	1.0496
TCGA-R5-A7O7-01A-11R-A33Y-31	2.431
TCGA-R5-A7ZF-01A-11R-A354-31	1.1607
TCGA-R5-A7ZI-01A-11R-A354-31	0.6628
TCGA-R5-A7ZR-01A-11R-A354-31	1.9223
TCGA-R5-A805-01A-11R-A36D-31	3.4808
TCGA-RD-A7BS-01A-11R-A32D-31	2.5982
TCGA-RD-A7BT-01A-11R-A33Y-31	0.4546
TCGA-RD-A7BW-01A-11R-A32D-31	6.9689
TCGA-RD-A7C1-01A-11R-A32D-31	1.7169
TCGA-RD-A8MV-01A-11R-A36D-31	0.8854
TCGA-RD-A8MW-01A-11R-A36D-31	1.1021
TCGA-RD-A8N0-01A-12R-A36D-31	1.6229
TCGA-RD-A8N1-01A-12R-A36D-31	0.8428
TCGA-RD-A8N2-01A-12R-A36D-31	3.0579
TCGA-RD-A8N4-01A-21R-A36D-31	1.9551
TCGA-RD-A8N5-01A-12R-A36D-31	3.2542
TCGA-RD-A8N6-01A-11R-A36D-31	1.5595
TCGA-RD-A8N9-01A-12R-A39E-31	3.0378
TCGA-RD-A8NB-01A-12R-A39E-31	2.9663
TCGA-SW-A7EA-01A-12R-A354-31	1.6233
TCGA-SW-A7EB-01A-11R-A354-31	1.0167
TCGA-VQ-A8DT-01A-11R-A36D-31	0.4569
TCGA-VQ-A8DU-01A-11R-A36D-31	2.2836
TCGA-VQ-A8DV-01A-12R-A36D-31	0.951
TCGA-VQ-A8DZ-01A-11R-A36D-31	2.6279
TCGA-VQ-A8E0-01A-11R-A414-31	1.6607
TCGA-VQ-A8E2-01A-11R-A36D-31	4.8152
TCGA-VQ-A8E3-01A-11R-A39E-31	2.3512
TCGA-VQ-A8P2-01A-11R-A36D-31	2.6946
TCGA-VQ-A8P3-01A-11R-A36D-31	1.6299
TCGA-VQ-A8P5-01A-11R-A39E-31	2.8693
TCGA-VQ-A8P8-01A-11R-A39E-31	1.3385
TCGA-VQ-A8PB-01A-11R-A39E-31	2.0595
TCGA-VQ-A8PC-01A-11R-A39E-31	2.0801
TCGA-VQ-A8PD-01A-11R-A414-31	3.0628
TCGA-VQ-A8PE-01A-11R-A414-31	0.7784
TCGA-VQ-A8PF-01A-11R-A414-31	3.7232
TCGA-VQ-A8PH-01A-12R-A414-31	0.8982
TCGA-VQ-A8PJ-01A-11R-A414-31	3.1124
TCGA-VQ-A8PK-01A-12R-A414-31	1.633
TCGA-VQ-A8PM-01A-21R-A414-31	2.3027
TCGA-VQ-A8PO-01A-11R-A414-31	1.3262
TCGA-VQ-A8PP-01A-21R-A414-31	1.7589
TCGA-VQ-A8PQ-01A-11R-A414-31	3.7841
TCGA-VQ-A8PU-01A-12R-A414-31	2.304
TCGA-VQ-A8PX-01A-12R-A414-31	0.9869
TCGA-VQ-A91A-01A-11R-A414-31	2.1863
TCGA-VQ-A91D-01A-11R-A414-31	1.0428
TCGA-VQ-A91E-01A-31R-A414-31	0.8514
TCGA-VQ-A91K-01A-11R-A414-31	2.7064
TCGA-VQ-A91N-01A-11R-A414-31	0.8932
TCGA-VQ-A91Q-01A-12R-A414-31	4.5909
TCGA-VQ-A91S-01A-11R-A414-31	1.1827
TCGA-VQ-A91U-01A-11R-A414-31	0.3977
TCGA-VQ-A91V-01A-11R-A414-31	2.3014
TCGA-VQ-A91W-01A-11R-A414-31	1.5759
TCGA-VQ-A91X-01A-12R-A414-31	0.5353
TCGA-VQ-A91Y-01A-11R-A414-31	2.9358
TCGA-VQ-A91Z-01A-11R-A414-31	0.9707
TCGA-VQ-A922-01A-11R-A414-31	5.6633
TCGA-VQ-A923-01A-11R-A414-31	2.4287
TCGA-VQ-A924-01A-11R-A414-31	3.2083
TCGA-VQ-A925-01A-11R-A414-31	4.9161
TCGA-VQ-A927-01A-12R-A414-31	1.417
TCGA-VQ-A928-01A-11R-A414-31	5.2554
TCGA-VQ-A92D-01A-11R-A414-31	2.4367
TCGA-VQ-A94O-01A-11R-A414-31	0.7696
TCGA-VQ-A94P-01A-13R-A414-31	4.8291
TCGA-VQ-A94R-01A-11R-A414-31	3.9218
TCGA-VQ-A94T-01A-11R-A414-31	1.4338
TCGA-VQ-A94U-01A-12R-A414-31	3.7169
TCGA-VQ-AA64-01A-11R-A414-31	3.9665
TCGA-VQ-AA68-01A-11R-A414-31	1.0596
TCGA-VQ-AA69-01A-11R-A414-31	1.6456
TCGA-VQ-AA6A-01A-11R-A414-31	1.7812
TCGA-VQ-AA6B-01A-11R-A414-31	1.1042
TCGA-VQ-AA6D-01A-11R-A414-31	2.2709
TCGA-VQ-AA6F-01A-31R-A414-31	2.1492
TCGA-VQ-AA6G-01A-11R-A414-31	1.7759
TCGA-VQ-AA6I-01A-11R-A414-31	2.4776
TCGA-VQ-AA6J-01A-11R-A414-31	1.7969
TCGA-VQ-AA6K-01A-11R-A414-31	2.1543
TCGA-ZA-A8F6-01A-23R-A36D-31	2.3528
TCGA-ZQ-A9CR-01A-11R-A39E-31	2.5041

## Sheet: GSE29272
	HIGD1B	group
GSM723464	6.87415	Normal
GSM723465	7.16671	Tumor
GSM723466	6.63964	Normal
GSM723467	7.0158	Tumor
GSM723468	6.86884	Normal
GSM723469	6.96548	Tumor
GSM723470	6.99628	Normal
GSM723471	7.0749	Tumor
GSM723472	6.81161	Normal
GSM723473	7.1166	Tumor
GSM723474	6.88281	Normal
GSM723475	7.10316	Tumor
GSM723476	7.15513	Normal
GSM723477	7.28798	Tumor
GSM723478	7.0093	Normal
GSM723479	7.29597	Tumor
GSM723480	6.92861	Normal
GSM723481	7.23696	Tumor
GSM723482	6.76611	Normal
GSM723483	6.49905	Tumor
GSM723484	6.69517	Normal
GSM723485	6.6975	Tumor
GSM723486	6.93972	Normal
GSM723487	7.0415	Tumor
GSM723488	6.70551	Normal
GSM723489	6.98736	Tumor
GSM723490	6.92466	Normal
GSM723491	6.77755	Tumor
GSM723492	6.83104	Normal
GSM723493	7.11205	Tumor
GSM723494	6.78389	Normal
GSM723495	6.99961	Tumor
GSM723496	6.90974	Normal
GSM723497	7.04268	Tumor
GSM723498	6.73095	Normal
GSM723499	6.89818	Tumor
GSM723500	6.90935	Normal
GSM723501	7.08597	Tumor
GSM723502	6.82038	Normal
GSM723503	7.07972	Tumor
GSM723504	6.62871	Normal
GSM723505	7.02375	Tumor
GSM723506	6.78034	Normal
GSM723507	7.19063	Tumor
GSM723508	7.13241	Normal
GSM723509	7.16631	Tumor
GSM723510	7.03598	Normal
GSM723511	7.31486	Tumor
GSM723512	6.8122	Normal
GSM723513	7.26382	Tumor
GSM723514	6.91032	Normal
GSM723515	7.05869	Tumor
GSM723516	6.69456	Normal
GSM723517	6.82281	Tumor
GSM723518	6.93845	Normal
GSM723519	6.8359	Tumor
GSM723520	6.88995	Normal
GSM723521	7.98808	Tumor
GSM723522	6.93271	Normal
GSM723523	6.87867	Tumor
GSM723524	6.90877	Normal
GSM723525	6.78802	Tumor
GSM723526	6.80822	Normal
GSM723527	6.80405	Tumor
GSM723528	6.82363	Normal
GSM723529	6.86246	Tumor
GSM723530	6.74301	Normal
GSM723531	6.69456	Tumor
GSM723532	7.02455	Normal
GSM723533	6.98659	Tumor
GSM723534	7.20463	Normal
GSM723535	6.86845	Tumor
GSM723536	7.08245	Normal
GSM723537	6.98016	Tumor
GSM723538	7.01163	Normal
GSM723539	7.09985	Tumor
GSM723540	7.40302	Normal
GSM723541	7.21005	Tumor
GSM723542	6.77	Normal
GSM723543	6.83788	Tumor
GSM723544	6.84533	Normal
GSM723545	6.88162	Tumor
GSM723546	7.00585	Normal
GSM723547	7.13262	Tumor
GSM723548	6.69041	Normal
GSM723549	6.6665	Tumor
GSM723550	6.97001	Normal
GSM723551	7.05316	Tumor
GSM723552	6.66353	Normal
GSM723553	6.84211	Tumor
GSM723554	7.08307	Normal
GSM723555	7.11325	Tumor
GSM723556	6.756	Normal
GSM723557	7.1881	Tumor
GSM723558	7.21732	Normal
GSM723559	6.86163	Tumor
GSM723560	7.05336	Normal
GSM723561	7.23074	Tumor
GSM723562	6.61884	Normal
GSM723563	6.97594	Tumor
GSM723564	6.73598	Normal
GSM723565	7.02017	Tumor
GSM723566	6.94602	Normal
GSM723567	7.06885	Tumor
GSM723568	7.016	Normal
GSM723569	7.0965	Tumor
GSM723570	6.51834	Normal
GSM723571	6.87507	Tumor
GSM723572	7.16295	Normal
GSM723573	7.27941	Tumor
GSM723574	6.96689	Normal
GSM723575	6.52718	Tumor
GSM723576	7.09223	Normal
GSM723577	7.02297	Tumor
GSM723578	6.8156	Normal
GSM723579	7.24691	Tumor
GSM723580	6.89157	Normal
GSM723581	6.62409	Tumor
GSM723582	7.10316	Normal
GSM723583	6.93726	Tumor
GSM723584	6.6167	Normal
GSM723585	7.41415	Tumor
GSM723586	6.86451	Normal
GSM723587	6.71173	Tumor
GSM723588	6.9152	Normal
GSM723589	6.8112	Tumor
GSM723590	6.86941	Normal
GSM723591	7.03639	Tumor
GSM723592	6.82659	Normal
GSM723593	7.04902	Tumor
GSM723594	6.68815	Normal
GSM723595	6.41796	Tumor
GSM723596	7.10355	Normal
GSM723597	6.777	Tumor
GSM723598	6.86246	Normal
GSM723599	7.03041	Tumor
GSM723600	6.67197	Normal
GSM723601	6.83388	Tumor
GSM723602	7.09284	Normal
GSM723603	6.8964	Tumor
GSM723604	7.19156	Normal
GSM723605	7.14814	Tumor
GSM723606	6.8966	Normal
GSM723607	7.08461	Tumor
GSM723608	7.259	Normal
GSM723609	7.3865	Tumor
GSM723610	7.17863	Normal
GSM723611	7.18767	Tumor
GSM723612	7.33088	Normal
GSM723613	7.35701	Tumor
GSM723614	7.18374	Normal
GSM723615	7.06713	Tumor
GSM723616	7.31856	Normal
GSM723617	7.40902	Tumor
GSM723618	7.16401	Normal
GSM723619	7.26653	Tumor
GSM723620	7.17965	Normal
GSM723621	7.50812	Tumor
GSM723622	7.19658	Normal
GSM723623	7.26816	Tumor
GSM723624	7.57084	Normal
GSM723625	7.51749	Tumor
GSM723626	7.2495	Normal
GSM723627	7.54952	Tumor
GSM723628	7.06341	Normal
GSM723629	7.25255	Tumor
GSM723630	6.97903	Normal
GSM723631	6.97516	Tumor
GSM723632	7.20928	Normal
GSM723633	7.20483	Tumor
GSM723634	7.2309	Normal
GSM723635	7.14774	Tumor
GSM723636	7.09461	Normal
GSM723637	7.17904	Tumor
GSM723638	6.91277	Normal
GSM723639	7.49193	Tumor
GSM723640	7.30434	Normal
GSM723641	7.20521	Tumor
GSM723642	7.3742	Normal
GSM723643	7.41712	Tumor
GSM723644	6.95035	Normal
GSM723645	6.88045	Tumor
GSM723646	7.21813	Normal
GSM723647	7.23543	Tumor
GSM723648	7.58321	Normal
GSM723649	7.54055	Tumor
GSM723650	7.22241	Normal
GSM723651	6.89462	Tumor
GSM723652	7.17125	Normal
GSM723653	7.0967	Tumor
GSM723654	7.34179	Normal
GSM723655	7.37202	Tumor
GSM723656	7.55787	Normal
GSM723657	7.23738	Tumor
GSM723658	6.92192	Normal
GSM723659	7.21679	Tumor
GSM723660	7.16062	Normal
GSM723661	6.99143	Tumor
GSM723662	6.97083	Normal
GSM723663	7.48698	Tumor
GSM723664	7.37242	Normal
GSM723665	7.2926	Tumor
GSM723666	7.08847	Normal
GSM723667	7.26856	Tumor
GSM723668	7.60613	Normal
GSM723669	7.58462	Tumor
GSM723670	7.17125	Normal
GSM723671	7.46784	Tumor
GSM723672	7.29539	Normal
GSM723673	7.74065	Tumor
GSM723674	7.40824	Normal
GSM723675	7.48413	Tumor
GSM723676	7.22512	Normal
GSM723677	7.23871	Tumor
GSM723678	7.32264	Normal
GSM723679	7.37457	Tumor
GSM723680	7.25529	Normal
GSM723681	7.09345	Tumor
GSM723682	7.14619	Normal
GSM723683	7.54993	Tumor
GSM723684	7.27766	Normal
GSM723685	7.21137	Tumor
GSM723686	7.48599	Normal
GSM723687	7.55365	Tumor
GSM723688	7.37065	Normal
GSM723689	7.00486	Tumor
GSM723690	7.37085	Normal
GSM723691	7.20405	Tumor
GSM723692	7.40824	Normal
GSM723693	7.28432	Tumor
GSM723694	7.36064	Normal
GSM723695	7.46983	Tumor
GSM723696	7.2901	Normal
GSM723697	7.08052	Tumor
GSM723698	7.07352	Normal
GSM723699	7.35115	Tumor
GSM723700	7.22068	Normal
GSM723701	7.451	Tumor
GSM723702	7.1612	Normal
GSM723703	7.18703	Tumor
GSM723704	7.22141	Normal
GSM723705	7.22032	Tumor
GSM723706	7.00625	Normal
GSM723707	6.97162	Tumor
GSM723708	7.28819	Normal
GSM723709	7.22919	Tumor
GSM723710	6.89858	Normal
GSM723711	7.2738	Tumor
GSM723712	7.01362	Normal
GSM723713	7.66789	Tumor
GSM723714	7.38477	Normal
GSM723715	7.33303	Tumor
GSM723716	7.23488	Normal
GSM723717	7.00565	Tumor
GSM723718	7.23327	Normal
GSM723719	7.24195	Tumor
GSM723720	7.02646	Normal
GSM723721	7.56344	Tumor
GSM723722	6.92446	Normal
GSM723723	7.79091	Tumor
GSM723724	7.22414	Normal
GSM723725	7.12121	Tumor
GSM723726	7.2406	Normal
GSM723727	7.17125	Tumor
GSM723728	7.41177	Normal
GSM723729	7.07803	Tumor
GSM723730	7.09842	Normal
GSM723731	7.17219	Tumor

## Sheet: GSE54129
	HIGD1B	group
GSM1308392	2.75449	Normal
GSM1308393	2.72805	Normal
GSM1308394	2.67617	Normal
GSM1308395	2.79197	Normal
GSM1308396	2.83773	Normal
GSM1308397	2.80879	Normal
GSM1308398	2.7693	Normal
GSM1308399	2.70032	Normal
GSM1308400	2.76308	Normal
GSM1308401	2.77105	Normal
GSM1308402	2.73785	Normal
GSM1308403	2.68349	Normal
GSM1308404	2.77849	Normal
GSM1308405	2.73946	Normal
GSM1308406	2.81223	Normal
GSM1308407	2.78609	Normal
GSM1308408	2.78253	Normal
GSM1308409	2.7879	Normal
GSM1308410	2.7535	Normal
GSM1308411	2.80868	Normal
GSM1308412	2.71402	Normal
GSM1308413	2.66403	Tumor
GSM1308414	2.90833	Tumor
GSM1308415	2.82591	Tumor
GSM1308416	2.73321	Tumor
GSM1308417	2.78669	Tumor
GSM1308418	2.83266	Tumor
GSM1308419	2.91108	Tumor
GSM1308420	2.91598	Tumor
GSM1308421	2.74094	Tumor
GSM1308422	2.69922	Tumor
GSM1308423	2.88697	Tumor
GSM1308424	2.79222	Tumor
GSM1308425	2.7527	Tumor
GSM1308426	2.97764	Tumor
GSM1308427	3.0269	Tumor
GSM1308428	3.10826	Tumor
GSM1308429	2.7768	Tumor
GSM1308430	2.99568	Tumor
GSM1308431	2.84604	Tumor
GSM1308432	2.92478	Tumor
GSM1308433	2.79032	Tumor
GSM1308434	2.72159	Tumor
GSM1308435	2.77175	Tumor
GSM1308436	2.83279	Tumor
GSM1308437	2.8535	Tumor
GSM1308438	2.86318	Tumor
GSM1308439	2.78174	Tumor
GSM1308440	2.9413	Tumor
GSM1308441	2.86372	Tumor
GSM1308442	2.77644	Tumor
GSM1308443	2.81941	Tumor
GSM1308444	2.80614	Tumor
GSM1308445	2.97435	Tumor
GSM1308446	2.78979	Tumor
GSM1308447	2.88632	Tumor
GSM1308448	2.91587	Tumor
GSM1308449	2.65182	Tumor
GSM1308450	2.77144	Tumor
GSM1308451	3.03716	Tumor
GSM1308452	2.86626	Tumor
GSM1308453	2.87193	Tumor
GSM1308454	2.75649	Tumor
GSM1308455	2.81225	Tumor
GSM1308456	2.92494	Tumor
GSM1308457	2.84971	Tumor
GSM1308458	2.92138	Tumor
GSM1308459	2.81052	Tumor
GSM1308460	2.93506	Tumor
GSM1308461	2.82511	Tumor
GSM1308462	2.80764	Tumor
GSM1308463	2.72923	Tumor
GSM1308464	3.05019	Tumor
GSM1308465	2.85023	Tumor
GSM1308466	2.90441	Tumor
GSM1308467	3.02693	Tumor
GSM1308468	3.01984	Tumor
GSM1308469	2.80409	Tumor
GSM1308470	2.74175	Tumor
GSM1308471	2.78433	Tumor
GSM1308472	2.82738	Tumor
GSM1308473	2.86261	Tumor
GSM1308474	2.74437	Tumor
GSM1308475	2.76212	Tumor
GSM1308476	2.82649	Tumor
GSM1308477	2.87377	Tumor
GSM1308478	2.78353	Tumor
GSM1308479	2.83041	Tumor
GSM1308480	2.79271	Tumor
GSM1308481	2.99751	Tumor
GSM1308482	2.89994	Tumor
GSM1308483	2.71314	Tumor
GSM1308484	3.00282	Tumor
GSM1308485	2.63812	Tumor
GSM1308486	2.78992	Tumor
GSM1308487	2.6931	Tumor
GSM1308488	2.89667	Tumor
GSM1308489	2.72416	Tumor
GSM1308490	2.74922	Tumor
GSM1308491	2.75285	Tumor
GSM1308492	2.98589	Tumor
GSM1308493	2.72865	Tumor
GSM1308494	2.84148	Tumor
GSM1308495	2.85283	Tumor
GSM1308496	2.83251	Tumor
GSM1308497	2.80513	Tumor
GSM1308498	2.72478	Tumor
GSM1308499	2.64034	Tumor
GSM1308500	2.76171	Tumor
GSM1308501	2.73912	Tumor
GSM1308502	2.63971	Tumor
GSM1308503	2.82712	Tumor
GSM1308504	2.74304	Tumor
GSM1308505	2.86547	Tumor
GSM1308506	2.82264	Tumor
GSM1308507	2.90139	Tumor
GSM1308508	2.82511	Tumor
GSM1308509	2.81019	Tumor
GSM1308510	2.76194	Tumor
GSM1308511	2.82588	Tumor
GSM1308512	2.75632	Tumor
GSM1308513	2.73768	Tumor
GSM1308514	2.74572	Tumor
GSM1308515	2.96777	Tumor
GSM1308516	2.93742	Tumor
GSM1308517	2.84403	Tumor
GSM1308518	2.89225	Tumor
GSM1308519	2.96868	Tumor
GSM1308520	2.71696	Tumor
GSM1308521	2.80663	Tumor
GSM1308522	2.84067	Tumor
GSM1308523	2.75848	Tumor

## Sheet: TCGA-STAD OS
	futime	fustat	HIGD1B	Expression
TCGA-CG-4306	0.00273973	1	1.6048	low
TCGA-HU-A4GQ	0.00821918	1	1.336	low
TCGA-FP-A8CX	0.0191781	0	0.8515	low
TCGA-BR-8363	0.0219178	1	2.9293	high
TCGA-HU-A4GY	0.0219178	0	3.0046	high
TCGA-BR-A4J9	0.0383562	0	2.5034	high
TCGA-BR-A4J4	0.0438356	0	2.067	high
TCGA-FP-8631	0.0465753	0	3.8477	high
TCGA-BR-A4J6	0.0547945	0	1.8825	low
TCGA-BR-8380	0.0575342	0	2.3806	high
TCGA-BR-8077	0.0575342	0	2.975	high
TCGA-BR-A4J1	0.060274	1	0.7844	low
TCGA-HU-8610	0.0630137	0	1.7341	low
TCGA-ZQ-A9CR	0.0657534	1	2.5041	high
TCGA-BR-8366	0.0794521	0	1.6453	low
TCGA-CG-5722	0.0821918	0	2.5926	high
TCGA-CG-5720	0.0821918	1	1.2668	low
TCGA-CG-5719	0.0849315	0	6.9686	high
TCGA-BR-8487	0.0931507	0	1.6429	low
TCGA-BR-A4PF	0.0958904	0	1.1676	low
TCGA-BR-A4CS	0.123288	1	4.1627	high
TCGA-HU-8238	0.126027	0	1.1686	low
TCGA-VQ-A91U	0.142466	1	0.3977	low
TCGA-VQ-A8PM	0.156164	1	2.3027	high
TCGA-HU-A4H0	0.175342	0	1.6403	low
TCGA-BR-8295	0.183562	1	2.5705	high
TCGA-VQ-A8PF	0.208219	1	3.7232	high
TCGA-IP-7968	0.210959	0	3.8716	high
TCGA-VQ-A94P	0.221918	1	4.8291	high
TCGA-BR-8289	0.221918	1	2.7454	high
TCGA-VQ-A8PJ	0.224658	1	3.1124	high
TCGA-CG-4301	0.252055	0	3.7595	high
TCGA-HU-A4GC	0.271233	0	1.7649	low
TCGA-IN-8663	0.282192	1	1.9147	low
TCGA-IN-7808	0.287671	1	1.0782	low
TCGA-BR-7901	0.287671	1	4.4974	high
TCGA-FP-7735	0.290411	1	3.1077	high
TCGA-MX-A5UG	0.309589	1	2.8387	high
TCGA-BR-8384	0.309589	0	3.3769	high
TCGA-CG-4440	0.334247	1	1.5218	low
TCGA-BR-4255	0.339726	1	5.3726	high
TCGA-BR-4253	0.339726	1	1.4902	low
TCGA-BR-8368	0.358904	0	1.2237	low
TCGA-D7-A748	0.361644	1	3.4277	high
TCGA-VQ-A925	0.378082	1	4.9161	high
TCGA-BR-4187	0.386301	1	3.5535	high
TCGA-FP-8210	0.419178	1	3.5889	high
TCGA-RD-A7BW	0.427397	1	6.9689	high
TCGA-BR-A4QM	0.427397	0	0.9474	low
TCGA-BR-8483	0.449315	0	2.5678	high
TCGA-VQ-A8DU	0.454795	1	2.2836	high
TCGA-FP-A4BF	0.460274	1	3.2563	high
TCGA-HU-A4G3	0.465753	0	1.3805	low
TCGA-VQ-A928	0.476712	1	5.2554	high
TCGA-SW-A7EB	0.482192	0	1.0167	low
TCGA-D7-A4YV	0.493151	0	1.9741	low
TCGA-HU-8243	0.493151	1	3.1117	high
TCGA-CG-5721	0.50137	0	1.8952	low
TCGA-R5-A7ZR	0.506849	1	1.9223	low
TCGA-BR-A453	0.506849	1	3.2728	high
TCGA-BR-4267	0.515068	1	1.4085	low
TCGA-FP-A9TM	0.517808	0	1.883	low
TCGA-BR-8592	0.523288	1	3.245	high
TCGA-CD-A486	0.526027	1	2.6786	high
TCGA-HU-A4GT	0.542466	0	0.7813	low
TCGA-IN-A7NR	0.542466	0	1.5848	low
TCGA-HU-A4GU	0.547945	0	0.6341	low
TCGA-VQ-A927	0.547945	1	1.417	low
TCGA-CD-A4MG	0.547945	1	2.2517	high
TCGA-BR-4280	0.550685	1	0.6374	low
TCGA-IN-A6RR	0.561644	1	1.1291	low
TCGA-CG-5717	0.580822	1	2.7252	high
TCGA-CG-4469	0.589041	1	2.3198	high
TCGA-CD-8527	0.59726	1	0.9565	low
TCGA-BR-8381	0.613699	0	3.0583	high
TCGA-BR-8297	0.616438	0	2.1617	high
TCGA-BR-8676	0.627397	0	0.4832	low
TCGA-BR-A452	0.627397	1	1.6338	low
TCGA-VQ-A8P5	0.643836	1	2.8693	high
TCGA-CG-4436	0.665753	0	0.5565	low
TCGA-CG-5734	0.665753	1	0.7844	low
TCGA-EQ-8122	0.665753	1	3.1831	high
TCGA-BR-8284	0.671233	1	4.1088	high
TCGA-CG-4437	0.671233	0	1.6435	low
TCGA-BR-8687	0.684932	1	1.1335	low
TCGA-D7-A747	0.69863	1	0.8849	low
TCGA-R5-A7ZF	0.709589	1	1.1607	low
TCGA-RD-A7BT	0.717808	1	0.4546	low
TCGA-HU-A4H8	0.739726	0	1.5376	low
TCGA-RD-A8N6	0.745205	1	1.5595	low
TCGA-BR-A4IZ	0.747945	1	7.9203	high
TCGA-HU-A4GP	0.747945	0	1.0722	low
TCGA-BR-6710	0.747945	0	0.3843	low
TCGA-CG-4465	0.750685	1	0.9983	low
TCGA-VQ-A922	0.753425	1	5.6633	high
TCGA-BR-7957	0.756164	1	4.7114	high
TCGA-BR-6565	0.764384	1	0.6145	low
TCGA-BR-7197	0.767123	0	2.9161	high
TCGA-BR-8485	0.767123	0	1.691	low
TCGA-R5-A805	0.769863	1	3.4808	high
TCGA-VQ-A8PO	0.772603	1	1.3262	low
TCGA-BR-4256	0.778082	1	2.1345	high
TCGA-BR-8590	0.778082	1	2.678	high
TCGA-B7-A5TN	0.786301	0	3.5639	high
TCGA-B7-A5TK	0.789041	0	1.7344	low
TCGA-VQ-A91X	0.791781	1	0.5353	low
TCGA-BR-4279	0.79726	1	5.3983	high
TCGA-BR-8080	0.8	1	3.118	high
TCGA-BR-4257	0.805479	1	1.1863	low
TCGA-VQ-A91Y	0.810959	1	2.9358	high
TCGA-MX-A663	0.821918	1	3.33	high
TCGA-BR-8683	0.821918	1	5.7502	high
TCGA-D7-6527	0.854795	1	2.6926	high
TCGA-IN-A7NT	0.884932	0	1.3616	low
TCGA-BR-8690	0.890411	0	1.0338	low
TCGA-B7-A5TJ	0.917808	0	1.7047	low
TCGA-RD-A7BS	0.920548	1	2.5982	high
TCGA-FP-A4BE	0.923288	0	1.9024	low
TCGA-CD-5803	0.934247	1	4.3587	high
TCGA-D7-A6EV	0.936986	0	0.3562	low
TCGA-VQ-A94T	0.936986	1	1.4338	low
TCGA-D7-A6EX	0.942466	0	1.2598	low
TCGA-D7-6820	0.942466	0	2.674	high
TCGA-CD-A489	0.942466	1	3.2955	high
TCGA-F1-A72C	0.947945	0	2.9854	high
TCGA-D7-A6EY	0.953425	1	2.0565	high
TCGA-BR-8060	0.953425	1	2.9048	high
TCGA-CD-A48C	0.967123	1	1.2566	low
TCGA-CD-8532	0.969863	1	2.1908	high
TCGA-VQ-A91D	0.975342	1	1.0428	low
TCGA-IN-A7NU	0.975342	0	1.1151	low
TCGA-B7-5818	0.975342	0	2.0438	low
TCGA-HU-A4GH	0.980822	0	0.9902	low
TCGA-CD-A4MI	0.980822	1	2.8207	high
TCGA-BR-8371	0.983562	1	1.7357	low
TCGA-CG-5724	1.00274	1	4.5517	high
TCGA-CD-8534	1.00548	0	3.4065	high
TCGA-BR-6709	1.0137	1	3.102	high
TCGA-CD-A4MH	1.01644	0	1.0934	low
TCGA-CD-8529	1.02466	0	2.3937	high
TCGA-CD-A487	1.02466	0	1.9472	low
TCGA-CD-8528	1.0274	0	1.493	low
TCGA-D7-6822	1.0274	0	1.981	low
TCGA-D7-6818	1.03014	1	3.0257	high
TCGA-CD-8530	1.03288	0	4.6076	high
TCGA-CD-5813	1.03288	1	4.3385	high
TCGA-CD-8536	1.03562	0	0.5082	low
TCGA-BR-7851	1.03562	0	2.4916	high
TCGA-VQ-AA6K	1.03562	1	2.1543	high
TCGA-CD-A48A	1.03562	0	1.697	low
TCGA-IN-A6RJ	1.03836	0	0.9221	low
TCGA-CD-8526	1.04384	0	2.3293	high
TCGA-IN-A6RS	1.04932	0	1.3438	low
TCGA-CD-8531	1.04932	0	1.6187	low
TCGA-CD-8525	1.04932	0	5.0597	high
TCGA-CD-A4MJ	1.05205	0	1.2793	low
TCGA-D7-5578	1.05479	0	3.0336	high
TCGA-CD-8524	1.06301	0	3.702	high
TCGA-D7-6817	1.06575	0	2.8323	high
TCGA-VQ-A8PH	1.06575	1	0.8982	low
TCGA-BR-8588	1.06575	0	1.0954	low
TCGA-CD-8535	1.06849	0	3.8697	high
TCGA-BR-A4IY	1.07397	0	1.6849	low
TCGA-HU-A4H2	1.07945	0	0.5347	low
TCGA-CD-5799	1.08493	0	1.6058	low
TCGA-VQ-A8DZ	1.08493	1	2.6279	high
TCGA-BR-8362	1.09041	1	2.3919	high
TCGA-CD-5800	1.09589	0	1.4156	low
TCGA-CD-5801	1.09863	1	1.1437	low
TCGA-VQ-A8DV	1.10411	1	0.951	low
TCGA-D7-6525	1.11233	1	1.322	low
TCGA-IN-A6RL	1.11233	1	1.7381	low
TCGA-CD-5798	1.11781	0	2.7989	high
TCGA-IN-AB1X	1.12603	0	1.3727	low
TCGA-BR-A4J8	1.12603	0	3.6995	high
TCGA-FP-8211	1.13151	0	1.2511	low
TCGA-BR-6457	1.13973	0	3.1822	high
TCGA-D7-A4YY	1.14795	0	1.1048	low
TCGA-BR-6455	1.15616	1	2.4027	high
TCGA-BR-A44U	1.15616	1	0.3956	low
TCGA-CG-4441	1.16712	1	1.8807	low
TCGA-MX-A666	1.16986	0	1.0496	low
TCGA-BR-8369	1.16986	0	5.4958	high
TCGA-FP-7916	1.1726	1	4.29	high
TCGA-BR-A4J2	1.18082	0	3.0276	high
TCGA-D7-A4YT	1.18904	0	5.1567	high
TCGA-BR-8059	1.20274	1	3.9302	high
TCGA-F1-6874	1.20548	0	1.9556	low
TCGA-D7-8576	1.22192	1	2.7942	high
TCGA-D7-A4Z0	1.23014	0	2.3107	high
TCGA-BR-8373	1.23288	0	3.5066	high
TCGA-CG-5725	1.25205	1	3.5401	high
TCGA-D7-6528	1.26849	0	1.3515	low
TCGA-BR-7722	1.27671	1	0.7164	low
TCGA-CD-8533	1.28219	0	2.1381	high
TCGA-BR-8296	1.29863	1	3.4028	high
TCGA-VQ-A8PQ	1.30411	1	3.7841	high
TCGA-D7-A6F2	1.30411	0	0.8993	low
TCGA-HU-A4HB	1.30685	1	1.0192	low
TCGA-IN-AB1V	1.31233	0	0.8567	low
TCGA-BR-6453	1.32877	0	3.8538	high
TCGA-CG-4305	1.32877	0	1.9577	low
TCGA-D7-6815	1.33151	0	2.8375	high
TCGA-BR-A4QL	1.34521	1	0.9835	low
TCGA-VQ-AA6I	1.34521	1	2.4776	high
TCGA-EQ-A4SO	1.35342	0	1.1372	low
TCGA-VQ-A8PD	1.3589	1	3.0628	high
TCGA-D7-A4YU	1.36986	0	3.3961	high
TCGA-RD-A7C1	1.38904	1	1.7169	low
TCGA-D7-8572	1.4	0	3.524	high
TCGA-RD-A8NB	1.40548	1	2.9663	high
TCGA-FP-8099	1.42192	0	1.845	low
TCGA-VQ-AA6D	1.4274	0	2.2709	high
TCGA-D7-8574	1.43288	0	2.4299	high
TCGA-D7-6526	1.43288	0	0.7131	low
TCGA-ZA-A8F6	1.43836	0	2.3528	high
TCGA-BR-6456	1.4411	1	1.6918	low
TCGA-BR-8365	1.46027	1	3.6847	high
TCGA-VQ-A8PK	1.48767	1	1.633	low
TCGA-D7-6524	1.48767	0	4.9946	high
TCGA-BR-6706	1.50411	1	2.0285	low
TCGA-BR-7717	1.51233	1	2.7573	high
TCGA-D7-8575	1.51781	1	2.8152	high
TCGA-BR-4191	1.52877	1	4.5534	high
TCGA-IN-A6RI	1.53151	0	2.1563	high
TCGA-VQ-AA64	1.53425	1	3.9665	high
TCGA-VQ-A8E0	1.53973	1	1.6607	low
TCGA-D7-6521	1.54521	0	1.961	low
TCGA-D7-6522	1.55068	0	2.7222	high
TCGA-VQ-A91N	1.56164	1	0.8932	low
TCGA-IN-8462	1.56712	0	2.1318	high
TCGA-D7-6520	1.56986	0	2.6016	high
TCGA-CG-4466	1.58082	0	1.8074	low
TCGA-SW-A7EA	1.5863	0	1.6233	low
TCGA-D7-6518	1.59452	0	4.1782	high
TCGA-BR-6458	1.61096	1	1.9146	low
TCGA-D7-8573	1.62466	0	2.7824	high
TCGA-FP-7829	1.6274	0	1.912	low
TCGA-IN-A6RN	1.6274	0	2.0172	low
TCGA-B7-A5TI	1.63014	0	4.9103	high
TCGA-MX-A5UJ	1.64384	0	3.0688	high
TCGA-BR-6707	1.65753	1	3.6119	high
TCGA-D7-A74A	1.66301	0	1.1473	low
TCGA-BR-8291	1.66301	1	2.6878	high
TCGA-KB-A93G	1.67945	0	4.0112	high
TCGA-HU-A4GX	1.68767	0	1.0647	low
TCGA-D7-A6EZ	1.69315	1	2.0568	high
TCGA-BR-A4PE	1.70137	0	1.018	low
TCGA-D7-6519	1.71233	0	1.1538	low
TCGA-BR-A4PD	1.72055	0	1.7848	low
TCGA-VQ-A91Q	1.73425	1	4.5909	high
TCGA-BR-8686	1.73973	1	1.9785	low
TCGA-D7-8579	1.74247	0	2.9607	high
TCGA-VQ-A94O	1.75342	1	0.7696	low
TCGA-HU-8608	1.75616	0	1.3288	low
TCGA-D7-8578	1.76164	0	2.3406	high
TCGA-HU-A4H6	1.76438	0	1.6037	low
TCGA-F1-A448	1.7726	0	1.8309	low
TCGA-HU-A4GJ	1.78082	0	2.3082	high
TCGA-BR-A4QI	1.7863	1	5.8124	high
TCGA-VQ-A8E3	1.81096	1	2.3512	high
TCGA-VQ-A91E	1.81918	0	0.8514	low
TCGA-BR-7196	1.82466	0	3.5218	high
TCGA-CG-4460	1.83288	1	1.6827	low
TCGA-BR-8364	1.84932	0	5.8897	high
TCGA-VQ-A8PE	1.84932	1	0.7784	low
TCGA-D7-A6F0	1.85753	0	1.5398	low
TCGA-FP-7998	1.85753	0	2.1321	high
TCGA-HU-8602	1.86027	0	2.1989	high
TCGA-HU-A4G8	1.89041	0	1.9411	low
TCGA-HU-A4GD	1.89589	0	3.2735	high
TCGA-HU-8604	1.90137	0	1.1537	low
TCGA-CG-4475	1.91507	0	5.5563	high
TCGA-VQ-A8PP	1.95068	1	1.7589	low
TCGA-HU-A4H5	1.98356	0	0.8411	low
TCGA-HU-A4H4	1.9863	0	1.6456	low
TCGA-HU-A4G9	2.01644	0	0.7293	low
TCGA-HU-A4G6	2.02192	0	1.2378	low
TCGA-HU-A4G2	2.02466	0	1.6616	low
TCGA-HU-8244	2.03288	0	0.858	low
TCGA-D7-8570	2.06027	0	1.8919	low
TCGA-BR-8678	2.06575	0	2.2332	high
TCGA-BR-8382	2.08767	1	1.1054	low
TCGA-BR-8484	2.09863	1	2.5824	high
TCGA-BR-6705	2.13425	1	6.3201	high
TCGA-D7-5577	2.14247	1	0.6729	low
TCGA-HU-A4GF	2.15068	0	0.7046	low
TCGA-VQ-AA6G	2.16986	1	1.7759	low
TCGA-BR-6564	2.17534	1	2.2599	high
TCGA-BR-8367	2.19452	1	2.8724	high
TCGA-HJ-7597	2.20548	1	2.6656	high
TCGA-B7-5816	2.22466	0	1.8647	low
TCGA-BR-8677	2.2274	0	3.5359	high
TCGA-VQ-A94U	2.24384	0	3.7169	high
TCGA-BR-8589	2.26027	0	2.1172	high
TCGA-VQ-A8PU	2.27945	1	2.304	high
TCGA-BR-A4IU	2.29589	0	3.7942	high
TCGA-VQ-AA6J	2.29589	0	1.7969	low
TCGA-BR-8591	2.34521	0	2.7281	high
TCGA-BR-A4J5	2.36164	0	3.0891	high
TCGA-VQ-AA69	2.36712	0	1.6456	low
TCGA-BR-A4IV	2.38082	1	2.5654	high
TCGA-BR-7723	2.39452	1	1.1456	low
TCGA-HU-8249	2.4137	0	0.7245	low
TCGA-CG-5726	2.4137	1	1.4631	low
TCGA-HU-A4H3	2.41644	0	1.1396	low
TCGA-BR-8286	2.45205	0	1.7508	low
TCGA-BR-7958	2.46301	0	2.2829	high
TCGA-BR-8078	2.46575	0	3.1502	high
TCGA-CG-4443	2.49863	0	0.58	low
TCGA-HU-A4GN	2.49863	0	1.7195	low
TCGA-HF-A5NB	2.54247	0	1.7478	low
TCGA-BR-6802	2.57534	0	0.9928	low
TCGA-BR-4201	2.57534	1	2.4408	high
TCGA-CG-4477	2.58082	0	2.1951	high
TCGA-VQ-A8P8	2.58082	0	1.3385	low
TCGA-BR-8361	2.59178	0	2.5371	high
TCGA-BR-6803	2.6	0	3.4483	high
TCGA-BR-8372	2.60548	0	1.8846	low
TCGA-BR-8680	2.66301	0	4.4519	high
TCGA-BR-8081	2.68767	0	1.1006	low
TCGA-BR-A4J7	2.70959	0	3.3747	high
TCGA-BR-8682	2.71507	0	1.9543	low
TCGA-BR-6566	2.73151	0	1.4917	low
TCGA-VQ-A91S	2.73973	0	1.1827	low
TCGA-VQ-AA6B	2.74521	0	1.1042	low
TCGA-BR-7959	2.76712	0	4.2161	high
TCGA-HU-A4HD	2.78356	0	0.5804	low
TCGA-BR-7715	2.80274	0	3.413	high
TCGA-BR-A44T	2.84384	0	2.2749	high
TCGA-VQ-A8PB	2.85753	1	2.0595	high
TCGA-BR-6452	2.89041	0	1.4368	low
TCGA-BR-7704	2.93699	0	1.6346	low
TCGA-RD-A8N9	2.96712	0	3.0378	high
TCGA-BR-7707	2.9863	0	2.5148	high
TCGA-CG-5718	3	1	1.6781	low
TCGA-BR-7703	3.0137	0	1.5039	low
TCGA-IN-7806	3.03014	0	3.056	high
TCGA-D7-A4YX	3.03562	0	2.8315	high
TCGA-KB-A93J	3.07945	0	2.3997	high
TCGA-VQ-A8P3	3.10137	0	1.6299	low
TCGA-BR-8058	3.10411	0	3.2547	high
TCGA-KB-A93H	3.13699	0	0.8992	low
TCGA-RD-A8MW	3.1589	1	1.1021	low
TCGA-VQ-A8P2	3.17808	0	2.6946	high
TCGA-VQ-AA6A	3.24384	0	1.7812	low
TCGA-BR-6563	3.26027	0	2.5277	high
TCGA-VQ-A91A	3.28767	0	2.1863	high
TCGA-BR-7716	3.31507	0	1.4074	low
TCGA-BR-6801	3.35068	0	1.2167	low
TCGA-RD-A8N0	3.3863	0	1.6229	low
TCGA-VQ-A94R	3.54521	1	3.9218	high
TCGA-VQ-A91V	3.55342	0	2.3014	high
TCGA-VQ-A8E2	3.6137	0	4.8152	high
TCGA-VQ-AA68	3.63836	0	1.0596	low
TCGA-BR-6852	3.74521	0	2.2089	high
TCGA-R5-A7O7	3.80548	0	2.431	high
TCGA-VQ-A8PC	3.85479	1	2.0801	high
TCGA-CG-4444	3.92055	0	1.3735	low
TCGA-VQ-A8DT	4.06575	0	0.4569	low
TCGA-HF-7134	4.35068	0	1.4742	low
TCGA-CG-4438	4.50685	0	3.0249	high
TCGA-VQ-AA6F	4.50959	0	2.1492	high
TCGA-VQ-A924	4.61918	1	3.2083	high
TCGA-VQ-A91Z	4.63014	0	0.9707	low
TCGA-RD-A8N5	4.7863	1	3.2542	high
TCGA-3M-AB46	4.83562	0	0.9065	low
TCGA-FP-8209	4.96164	1	2.79	high
TCGA-VQ-A91W	5.07123	0	1.5759	low
TCGA-VQ-A91K	5.10137	0	2.7064	high
TCGA-HF-7133	5.25479	0	2.9899	high
TCGA-KB-A6F7	5.30137	0	0.4211	low
TCGA-VQ-A8PX	5.38082	0	0.9869	low
TCGA-VQ-A92D	5.56712	0	2.4367	high
TCGA-CG-5732	5.75342	1	0.7105	low
TCGA-RD-A8N4	5.94795	0	1.9551	low
TCGA-F1-6875	6.01918	1	0.8994	low
TCGA-R5-A7ZI	6.21096	0	0.6628	low
TCGA-HF-7132	6.4411	0	1.1486	low
TCGA-CG-5723	6.83836	0	1.3921	low
TCGA-RD-A8N1	9.6411	0	0.8428	low
TCGA-RD-A8N2	9.69863	0	3.0579	high
TCGA-RD-A8MV	10.1918	0	0.8854	low

## Sheet: GSE62254 OS
	fustat	futime	HIGD1B	Expression
GSM1523979	1	0.785833	1.74298	high
GSM1524024	1	7.4525	1.90184	high
GSM1524030	1	2.61083	1.8124	high
GSM1524062	1	5.85	1.76055	high
GSM1523929	0	7.36083	1.58473	low
GSM1523934	1	1.06667	1.80374	high
GSM1523951	1	4.41917	1.54943	low
GSM1523959	1	1.4525	1.70407	low
GSM1523965	1	0.955833	1.6704	low
GSM1523973	0	7.2725	1.68133	low
GSM1523978	1	1.3525	1.49448	low
GSM1523986	0	7.23333	1.74195	high
GSM1523989	0	7.225	1.9121	high
GSM1523994	0	7.1975	1.90227	high
GSM1523998	1	1.76917	1.71254	low
GSM1524002	0	7.1775	1.64871	low
GSM1524003	0	7.16083	1.56672	low
GSM1524004	1	0.494167	1.73148	high
GSM1524008	1	0.9025	1.69555	low
GSM1524010	1	1.64167	1.73211	high
GSM1524012	0	7.1025	1.4739	low
GSM1524016	1	2.31667	1.48825	low
GSM1524017	0	7.08583	1.71785	low
GSM1524018	0	7.06417	1.80218	high
GSM1524019	1	0.694167	1.61175	low
GSM1524020	0	7.025	1.72906	high
GSM1524021	1	1.0775	1.79427	high
GSM1524022	1	0.669167	1.69306	low
GSM1524023	0	6.98583	1.62114	low
GSM1524025	1	6.81917	1.69398	low
GSM1524026	0	6.96667	1.98131	high
GSM1524027	1	4.975	1.679	low
GSM1524028	1	3.975	1.87798	high
GSM1524029	1	2.59167	1.813	high
GSM1524031	0	6.83333	1.76529	high
GSM1524032	1	6.43333	1.78783	high
GSM1524033	0	6.73583	1.52581	low
GSM1524034	1	3.6725	1.83123	high
GSM1524035	0	6.69167	1.78284	high
GSM1524036	0	6.66083	1.70082	low
GSM1524037	1	1.9525	1.64169	low
GSM1524038	1	0.719167	1.79608	high
GSM1524039	1	1.00583	1.62619	low
GSM1524040	1	3.01417	1.68826	low
GSM1524041	0	6.44417	1.77761	high
GSM1524042	1	0.9025	1.79515	high
GSM1524043	1	1.4025	1.88756	high
GSM1524044	1	1.90583	1.80885	high
GSM1524045	0	7.4275	1.60981	low
GSM1524046	0	7.33583	1.8303	high
GSM1524047	0	5.8225	1.70678	low
GSM1524048	1	3.9	1.73153	high
GSM1524049	0	7.31667	1.80799	high
GSM1524050	1	4.76083	1.75107	high
GSM1524051	0	7.2725	1.71954	low
GSM1524068	0	7.73917	1.65366	low
GSM1524052	1	1.0975	1.75731	high
GSM1524053	0	7.24417	1.64033	low
GSM1524054	0	7.21417	1.56708	low
GSM1524055	1	3.16083	1.66987	low
GSM1524069	1	7.13333	1.73682	high
GSM1524056	1	1.18083	1.52904	low
GSM1524070	0	7.63583	1.65683	low
GSM1524057	1	1.3275	2.0647	high
GSM1524058	0	7.1225	1.53145	low
GSM1524059	0	7.1	1.9434	high
GSM1524071	0	7.56417	1.59278	low
GSM1524072	1	3.5775	1.79318	high
GSM1524060	0	7.06917	1.73912	high
GSM1524061	0	7.05	1.46872	low
GSM1523919	0	7.00833	1.76841	high
GSM1523920	1	0.7775	1.6168	low
GSM1523921	0	6.94167	1.6924	low
GSM1523727	0	7.39417	1.77742	high
GSM1523728	0	7.3525	1.67044	low
GSM1523729	0	7.3525	1.67105	low
GSM1523922	1	1.96667	1.73497	high
GSM1523923	1	2.2	1.50368	low
GSM1523924	0	6.85	1.84307	high
GSM1523925	1	0.525	1.59808	low
GSM1523926	0	5.7525	1.44369	low
GSM1523927	0	6.73083	1.49741	low
GSM1523928	1	4.51083	1.71993	low
GSM1523930	0	6.54417	1.8494	high
GSM1523931	0	6.46667	1.63042	low
GSM1523932	1	1.05583	1.65781	low
GSM1523933	0	6.2725	1.62844	low
GSM1523935	0	7.28333	1.79456	high
GSM1523936	1	1.46417	2.02374	high
GSM1523937	1	1.63917	1.70832	low
GSM1523938	1	0.480833	2.01418	high
GSM1523939	1	0.935833	2.0332	high
GSM1523940	1	1.66917	1.78691	high
GSM1523941	1	0.3775	1.7756	high
GSM1523942	0	5.85583	1.54512	low
GSM1523943	1	0.460833	1.68406	low
GSM1523944	0	5.8025	1.60505	low
GSM1523945	1	1.46083	1.75137	high
GSM1523946	0	5.74417	1.66018	low
GSM1523947	0	5.7025	1.61011	low
GSM1523948	1	2.28917	1.96943	high
GSM1523949	1	0.841667	1.86351	high
GSM1523950	0	5.68333	1.68905	low
GSM1523952	0	8.40583	1.88972	high
GSM1523953	0	7.06417	1.51716	low
GSM1523954	0	8.40583	1.76286	high
GSM1523955	1	2.86417	1.896	high
GSM1523956	1	2.59417	1.51158	low
GSM1523957	0	8.38583	1.76327	high
GSM1523958	0	8.3525	1.62118	low
GSM1523744	0	8.80833	1.75755	high
GSM1523745	0	8.79417	1.73978	high
GSM1523746	1	2.125	1.73569	high
GSM1523747	1	0.725	1.6683	low
GSM1523748	0	8.74417	1.84401	high
GSM1523960	0	8.25	1.80738	high
GSM1523961	1	0.791667	1.74827	high
GSM1523962	1	1.6775	1.68154	low
GSM1523963	1	3.81417	1.78345	high
GSM1523964	0	8.21083	1.6066	low
GSM1523966	1	4.31667	1.69094	low
GSM1523967	0	8.20583	1.63799	low
GSM1523968	1	3.76417	1.78556	high
GSM1523969	1	1.49167	1.84033	high
GSM1523970	1	1.30833	1.8271	high
GSM1523971	1	1.10833	1.75881	high
GSM1523972	1	0.541667	1.755	high
GSM1523974	0	8.18583	1.59934	low
GSM1523975	1	0.6	1.90767	high
GSM1523976	1	4.66667	1.89632	high
GSM1523977	1	0.0833333	1.56878	low
GSM1523980	1	0.558333	1.75972	high
GSM1523981	0	8.1	1.86326	high
GSM1523982	1	0.725	2.00271	high
GSM1523983	1	0.841667	1.69898	low
GSM1523984	0	8.08083	1.98659	high
GSM1523918	1	2.34417	1.93624	high
GSM1523985	1	6.46083	1.89652	high
GSM1523987	1	1.5225	1.79163	high
GSM1523988	1	1.23583	2.05787	high
GSM1523990	1	1.18083	1.9776	high
GSM1523991	0	7.93333	1.91946	high
GSM1523992	1	1.6775	1.66426	low
GSM1523993	1	5.6775	1.75149	high
GSM1523765	1	1.18333	1.69232	low
GSM1523995	1	0.530833	1.8043	high
GSM1523996	1	2.93333	1.96348	high
GSM1523997	1	2.1	1.75112	high
GSM1523999	0	7.8225	1.76281	high
GSM1524000	0	7.8225	1.86627	high
GSM1523768	1	2.01917	1.7987	high
GSM1524001	0	7.8025	1.73475	high
GSM1523769	1	1.14417	1.72226	low
GSM1523770	1	1.83917	1.50169	low
GSM1523771	1	1.05583	2.12728	high
GSM1523772	1	0.835833	1.80772	high
GSM1523773	1	0.360833	1.88756	high
GSM1523774	0	8.14167	1.52619	low
GSM1523775	0	8.13333	1.5951	low
GSM1523776	0	8.1225	1.68701	low
GSM1524005	1	0.789167	1.60918	low
GSM1524006	1	2.18917	1.85603	high
GSM1524007	1	0.864167	1.59093	low
GSM1524009	1	5.41667	1.80781	high
GSM1524011	0	7.51667	1.81644	high
GSM1524013	0	7.49167	1.73682	high
GSM1524014	1	0.944167	1.91946	high
GSM1524015	1	2.0725	1.53796	low
GSM1523777	0	7.74417	1.68761	low
GSM1523778	0	7.71917	1.69533	low
GSM1523779	0	7.71667	1.64655	low
GSM1523780	1	1.36667	1.73555	high
GSM1523781	1	0.244167	1.69468	low
GSM1523782	1	0.366667	1.7143	low
GSM1523783	0	7.66083	1.79486	high
GSM1523784	0	7.60833	1.90129	high
GSM1523785	1	0.980833	1.68419	low
GSM1523786	1	2.3725	1.85417	high
GSM1523787	0	7.46917	1.6405	low
GSM1523788	1	0.689167	1.79267	high
GSM1523789	1	0.983333	1.91054	high
GSM1523790	0	6.74417	1.72042	low
GSM1523791	0	6.76083	1.6153	low
GSM1523792	0	6.73333	1.64546	low
GSM1523793	0	6.7275	1.58291	low
GSM1523794	1	2.25	1.73354	high
GSM1523795	0	6.6725	1.68024	low
GSM1523796	1	4.8025	2.1006	high
GSM1523797	1	2.35583	1.66141	low
GSM1523798	1	5.1525	1.83866	high
GSM1523799	0	6.45833	1.55161	low
GSM1523800	0	6.41083	1.70902	low
GSM1523801	0	6.41083	1.7537	high
GSM1523802	0	6.3975	1.69179	low
GSM1523803	1	0.589167	1.7759	high
GSM1523804	0	6.39167	1.85603	high
GSM1523805	1	0.3725	1.81625	high
GSM1523806	1	1.05833	1.61281	low
GSM1523807	0	6.14417	1.61908	low
GSM1523808	0	6.125	1.75237	high
GSM1523809	0	6.11917	1.77317	high
GSM1523810	0	6.08917	1.63421	low
GSM1523811	0	6.0725	1.68327	low
GSM1523812	0	6.06917	1.75616	high
GSM1523813	0	6.06917	1.80838	high
GSM1523814	0	6.06083	1.72315	low
GSM1523815	1	2.0975	1.87438	high
GSM1523816	0	6.00583	1.66612	low
GSM1523817	1	0.519167	1.80356	high
GSM1523818	1	0.819167	1.75005	high
GSM1523819	1	0.841667	1.71772	low
GSM1523820	1	1.975	1.65231	low
GSM1523821	0	5.925	1.57996	low
GSM1523822	0	5.91417	1.70454	low
GSM1523823	0	5.90833	1.61617	low
GSM1523824	0	5.88917	1.71715	low
GSM1523825	1	0.333333	1.64062	low
GSM1523826	1	0.225	1.54154	low
GSM1523827	0	5.83583	1.74987	high
GSM1523828	1	0.489167	1.7304	high
GSM1523829	0	5.81917	1.60539	low
GSM1523830	1	4.4525	1.66801	low
GSM1523831	1	2.575	1.63459	low
GSM1523832	1	1.4725	1.81784	high
GSM1523833	1	0.739167	1.76399	high
GSM1523834	1	3.71417	1.6261	low
GSM1523835	0	5.775	1.74927	high
GSM1523836	0	5.76917	1.79763	high
GSM1523837	1	2.23583	1.53071	low
GSM1523838	1	0.860833	1.57914	low
GSM1523839	0	5.76083	1.65986	low
GSM1523840	1	1.9025	1.73996	high
GSM1523841	1	3.50583	1.77609	high
GSM1523842	1	4.06083	1.62614	low
GSM1523843	1	2.15583	1.84467	high
GSM1523844	0	5.74167	1.54983	low
GSM1523845	1	0.805833	1.78201	high
GSM1523846	0	5.6975	1.94859	high
GSM1523847	0	5.6775	1.71037	low
GSM1523848	0	5.6775	1.7922	high
GSM1523849	1	2.33583	1.92743	high
GSM1523850	1	3.03333	1.90517	high
GSM1523851	0	5.6025	1.61537	low
GSM1523852	1	2.58333	1.73005	high
GSM1523853	0	5.56083	1.61803	low
GSM1523854	0	5.56083	1.65957	low
GSM1523855	1	1.8275	1.69502	low
GSM1523856	0	5.51667	1.79603	high
GSM1523857	1	1.2025	1.86182	high
GSM1523858	1	1.425	1.96391	high
GSM1523859	0	4.4275	1.63662	low
GSM1523860	1	3.51667	1.72464	low
GSM1523861	0	5.4	1.66845	low
GSM1523862	1	1.75	1.79001	high
GSM1523863	0	5.38083	1.64219	low
GSM1523864	0	5.33083	1.70195	low
GSM1523865	0	5.30833	1.73479	high
GSM1523866	1	0.364167	1.75089	high
GSM1523867	1	2.7725	1.67542	low
GSM1523868	0	5.2725	1.64484	low
GSM1523869	0	5.21083	1.62159	low
GSM1523870	0	5.20583	1.61229	low
GSM1523871	0	5.1975	1.64125	low
GSM1523872	1	1.2525	1.6889	low
GSM1523873	1	2.0025	1.72203	low
GSM1523874	0	5.175	1.94307	high
GSM1523875	1	0.705833	1.5212	low
GSM1523876	0	5.15833	1.72051	low
GSM1523877	1	1.09167	1.69736	low
GSM1523878	0	5.15583	1.71059	low
GSM1523879	0	5.0975	1.70528	low
GSM1523880	0	5.08083	1.67397	low
GSM1523881	1	1.24167	1.65114	low
GSM1523882	0	5.05833	1.6615	low
GSM1523883	1	3.29417	1.70911	low
GSM1523884	0	5.03583	1.81902	high
GSM1523885	0	5.01917	1.68431	low
GSM1523886	1	0.466667	1.86531	high
GSM1523887	0	5.01667	1.44027	low
GSM1523888	0	4.99167	1.75939	high
GSM1523889	0	4.9725	1.62807	low
GSM1523890	0	4.96417	1.72707	low
GSM1523891	0	4.96417	1.81142	high
GSM1523892	0	4.95583	1.65638	low
GSM1523893	1	1.675	1.72931	high
GSM1523894	1	2.98083	1.80172	high
GSM1523895	0	4.91917	1.62696	low
GSM1523896	1	2.33583	1.94864	high
GSM1523897	0	4.90583	1.74019	high
GSM1523898	0	4.9025	1.74151	high
GSM1523899	0	4.83917	1.74169	high
GSM1523901	0	4.78917	1.75107	high
GSM1523903	1	3.31667	1.77812	high
GSM1523904	0	4.61417	1.75674	high
GSM1523905	0	4.60833	1.83015	high
GSM1523906	0	4.60833	1.67592	low
GSM1523908	0	4.58917	1.74429	high
GSM1523909	0	4.54417	1.59125	low
GSM1523910	0	4.5275	1.63169	low
GSM1523911	1	1.81917	1.6024	low

## Sheet: GSE84437 OS
	futime	fustat	HIGD1B	Expression
GSM2236048	8.5	0	5.50768	low
GSM2235731	9.83333	0	5.59664	low
GSM2235889	7.75	1	5.60187	low
GSM2235739	1.16667	1	5.60355	low
GSM2235758	1.08333	1	5.60978	low
GSM2235752	12.4167	0	5.61605	low
GSM2235749	3.25	1	5.63682	low
GSM2236029	11.5	0	5.64119	low
GSM2235952	0.0833333	1	5.65751	low
GSM2235701	9	0	5.66767	low
GSM2235852	4	1	5.67552	low
GSM2235575	7.16667	0	5.67788	low
GSM2235828	8.91667	0	5.68054	low
GSM2235712	9	0	5.68635	low
GSM2235715	9.83333	0	5.69088	low
GSM2235582	1.08333	1	5.69423	low
GSM2235696	9	0	5.69444	low
GSM2236045	13.4167	0	5.69479	low
GSM2235822	9.33333	0	5.71846	low
GSM2235996	0.5	1	5.72201	low
GSM2235769	1.83333	1	5.72511	low
GSM2235941	3.41667	0	5.72578	low
GSM2235735	12.0833	0	5.73339	low
GSM2236023	9	0	5.73714	low
GSM2235764	0.75	1	5.73773	low
GSM2235851	7.75	1	5.73808	low
GSM2235766	1.25	1	5.73889	low
GSM2235695	10.0833	0	5.74018	low
GSM2236074	11.9167	0	5.74808	low
GSM2235928	11	0	5.74895	low
GSM2236024	8.58333	0	5.74968	low
GSM2235784	8.58333	1	5.75609	low
GSM2235730	4.08333	1	5.76706	low
GSM2235740	0.333333	1	5.77306	low
GSM2235968	4.91667	0	5.77623	low
GSM2235803	8.91667	0	5.77791	low
GSM2236069	9.58333	0	5.78002	low
GSM2235960	11.8333	0	5.78007	low
GSM2236044	11.75	0	5.78653	low
GSM2235742	0.25	1	5.79172	low
GSM2235751	8.41667	0	5.7954	low
GSM2235802	8.83333	0	5.79983	low
GSM2235779	4.08333	1	5.80113	low
GSM2235616	0.0833333	1	5.80341	low
GSM2235763	9.08333	1	5.80422	low
GSM2235888	5.66667	1	5.80909	low
GSM2236032	11.1667	0	5.8131	low
GSM2235907	10.25	0	5.81525	low
GSM2235963	2.25	1	5.82003	low
GSM2236093	12.5833	0	5.82054	low
GSM2236028	7.91667	1	5.82184	low
GSM2235878	10.4167	0	5.82665	low
GSM2236088	2.83333	1	5.83493	low
GSM2235736	0.75	1	5.83956	low
GSM2235994	10.25	0	5.83983	low
GSM2236022	8.66667	0	5.84257	low
GSM2236027	10.3333	0	5.84301	low
GSM2235623	1.75	1	5.84623	low
GSM2236064	6.41667	1	5.84885	low
GSM2235997	10.6667	0	5.84892	low
GSM2236047	4.08333	1	5.85041	low
GSM2235719	0.0833333	1	5.85236	low
GSM2236020	9.08333	0	5.85557	low
GSM2235613	6.91667	0	5.85599	low
GSM2236016	1.66667	1	5.85609	low
GSM2236053	1.83333	1	5.85652	low
GSM2235790	9.91667	0	5.86008	low
GSM2236055	11.0833	0	5.86145	low
GSM2235556	5.83333	1	5.86164	low
GSM2236019	7.66667	1	5.86423	low
GSM2236084	10.6667	0	5.86552	low
GSM2236056	10.6667	0	5.86759	low
GSM2235971	5.25	0	5.87025	low
GSM2236049	2.75	1	5.87274	low
GSM2235972	4.75	0	5.87285	low
GSM2235781	9.58333	0	5.87336	low
GSM2235906	10	1	5.87673	low
GSM2236030	11.5	0	5.88907	low
GSM2236079	11.75	0	5.89012	low
GSM2235574	0.916667	1	5.89326	low
GSM2235593	6.41667	0	5.89585	low
GSM2236011	2.16667	1	5.89883	low
GSM2235974	1	1	5.89914	low
GSM2235829	9.08333	0	5.90356	low
GSM2235714	3.83333	1	5.90637	low
GSM2236085	12.6667	0	5.90673	low
GSM2236026	5.33333	1	5.90727	low
GSM2235839	8.41667	1	5.9077	low
GSM2236006	2	1	5.91293	low
GSM2235753	2.58333	1	5.91293	low
GSM2236071	9.5	0	5.91318	low
GSM2235806	8.41667	1	5.91541	low
GSM2235576	0.333333	1	5.92065	low
GSM2236052	9.66667	0	5.92423	low
GSM2235789	3.08333	1	5.93295	low
GSM2235842	1.16667	1	5.93625	low
GSM2235854	9.25	0	5.93827	low
GSM2236095	12.5	0	5.94066	low
GSM2235845	2.58333	1	5.94792	low
GSM2235959	12	0	5.94824	low
GSM2235797	9.58333	0	5.94887	low
GSM2235946	10.9167	0	5.94923	low
GSM2235865	2.75	1	5.95326	low
GSM2236042	3.08333	0	5.9576	low
GSM2236051	3.16667	1	5.95777	low
GSM2235718	9.91667	0	5.95843	low
GSM2235614	6.41667	0	5.95906	low
GSM2235804	9.5	0	5.96939	low
GSM2235925	11.1667	0	5.96992	low
GSM2235932	4.91667	0	5.97139	low
GSM2235826	0.916667	1	5.97665	low
GSM2236015	9.16667	0	5.97682	low
GSM2235810	0.583333	1	5.97937	low
GSM2235705	9.5	0	5.97962	low
GSM2235624	6.41667	0	5.97971	low
GSM2235709	9	0	5.98191	low
GSM2235840	7.66667	1	5.98449	low
GSM2235568	6.83333	0	5.98548	low
GSM2236004	3.83333	1	5.98977	low
GSM2235707	9.66667	0	5.9929	low
GSM2236092	12.4167	0	5.99943	low
GSM2236087	12.9167	0	5.99967	low
GSM2235931	11	0	6.00281	low
GSM2235571	6.66667	0	6.00644	low
GSM2235782	0.333333	1	6.01088	low
GSM2235844	8.5	0	6.01276	low
GSM2235850	9.66667	0	6.0132	low
GSM2236083	0.583333	1	6.01379	low
GSM2235721	9.91667	0	6.02475	low
GSM2235697	3.25	1	6.02571	low
GSM2236072	2.75	1	6.0262	low
GSM2235921	11.5833	0	6.02694	low
GSM2236033	10	0	6.02838	low
GSM2235881	10.4167	0	6.03446	low
GSM2235711	1.58333	1	6.03699	low
GSM2235578	1.75	1	6.04179	low
GSM2235595	1.25	1	6.04369	low
GSM2235809	12.1667	0	6.04474	low
GSM2236018	9.66667	0	6.04803	low
GSM2236070	10.3333	0	6.05054	low
GSM2236017	1.41667	1	6.05222	low
GSM2235846	7.66667	1	6.0613	low
GSM2235957	12.3333	0	6.06502	low
GSM2235831	3.25	1	6.06535	low
GSM2235991	2.66667	1	6.06567	low
GSM2235843	1.08333	1	6.06796	low
GSM2235723	9.83333	0	6.06842	low
GSM2236077	3.16667	0	6.06895	low
GSM2236094	3.08333	1	6.07535	low
GSM2236082	10.9167	0	6.07909	low
GSM2235754	11.5	0	6.08223	low
GSM2235585	1.91667	1	6.08257	low
GSM2236090	2.58333	1	6.08558	low
GSM2235799	1	1	6.09561	low
GSM2235622	1.91667	1	6.097	low
GSM2236065	9.91667	0	6.09923	low
GSM2236067	1.41667	1	6.10205	low
GSM2235813	2.16667	1	6.10341	low
GSM2235770	0.583333	1	6.10594	low
GSM2235620	5.91667	0	6.11221	low
GSM2236034	10.1667	0	6.11325	low
GSM2235584	4.75	1	6.11695	low
GSM2235792	7.66667	1	6.12121	low
GSM2235768	12	0	6.12159	low
GSM2235985	2.91667	0	6.12169	low
GSM2235563	1.16667	1	6.13317	low
GSM2235777	9.58333	1	6.13584	low
GSM2235725	10.1667	0	6.138	low
GSM2235771	11.9167	0	6.13863	low
GSM2235747	1	1	6.14213	low
GSM2235976	4.58333	0	6.14343	low
GSM2235569	6.83333	0	6.14648	low
GSM2235579	1.41667	1	6.15084	low
GSM2235727	9.83333	0	6.15133	low
GSM2235969	5.33333	0	6.15155	low
GSM2235608	6.66667	0	6.15345	low
GSM2235785	9.5	0	6.16209	low
GSM2235787	2.08333	1	6.1709	low
GSM2235999	7.91667	1	6.17522	low
GSM2236046	2.91667	1	6.17622	low
GSM2235704	9.08333	0	6.18505	low
GSM2235995	0.833333	1	6.19955	low
GSM2235757	3.33333	1	6.20144	low
GSM2235564	7	0	6.20881	low
GSM2235967	0.833333	1	6.20907	low
GSM2235743	0.333333	1	6.21049	low
GSM2235619	5.83333	0	6.21056	low
GSM2236058	11.3333	0	6.21161	low
GSM2236078	11.8333	0	6.21266	low
GSM2235886	4.25	1	6.21365	low
GSM2235910	11.5833	0	6.22181	low
GSM2235887	6.58333	1	6.22898	low
GSM2235821	9.33333	0	6.23261	low
GSM2235947	10.75	0	6.23393	low
GSM2236010	3.16667	1	6.23435	low
GSM2235733	12	0	6.23442	low
GSM2235962	2.25	1	6.23603	low
GSM2235986	2.91667	0	6.23838	low
GSM2235808	1.91667	1	6.24304	low
GSM2235927	0	1	6.244	low
GSM2235746	9.25	0	6.24435	low
GSM2235998	10.1667	0	6.24559	low
GSM2235774	1	1	6.24651	low
GSM2235603	6.66667	0	6.24673	low
GSM2235734	12	0	6.24695	low
GSM2235855	9.16667	0	6.24857	low
GSM2236014	8.75	1	6.25388	low
GSM2235820	2	1	6.25552	low
GSM2235587	5.33333	1	6.25721	low
GSM2235738	12.75	0	6.26035	low
GSM2236076	2.91667	0	6.26043	low
GSM2236066	10.5833	0	6.26111	low
GSM2235604	6.16667	0	6.26284	low
GSM2235815	9.41667	0	6.26499	low
GSM2235965	5.25	1	6.26605	low
GSM2235980	0.5	1	6.27264	low
GSM2235955	12.4167	0	6.27891	low
GSM2235849	0.0833333	1	6.28011	high
GSM2235706	0.166667	1	6.28084	high
GSM2235930	6.16667	1	6.28307	high
GSM2236040	3.08333	0	6.28427	high
GSM2235838	0.333333	1	6.28975	high
GSM2235617	5.91667	0	6.29091	high
GSM2235904	1.75	1	6.29503	high
GSM2235562	1.5	1	6.2963	high
GSM2235720	9.91667	0	6.29663	high
GSM2236007	1.75	1	6.29723	high
GSM2235853	9.25	0	6.29824	high
GSM2235981	3	0	6.29858	high
GSM2235830	8.16667	0	6.29942	high
GSM2235637	5.66667	0	6.30209	high
GSM2235923	1.16667	1	6.30364	high
GSM2235796	3.66667	1	6.30425	high
GSM2236089	12	0	6.30649	high
GSM2236012	0.25	1	6.31026	high
GSM2235759	1	1	6.312	high
GSM2235937	3.08333	0	6.31775	high
GSM2235586	6.41667	0	6.31993	high
GSM2235602	6.83333	0	6.32273	high
GSM2235798	2.08333	1	6.33387	high
GSM2235618	5.91667	0	6.34129	high
GSM2235627	5.83333	0	6.34262	high
GSM2235956	11.25	1	6.34555	high
GSM2236036	3.41667	0	6.35276	high
GSM2235788	9.75	0	6.35532	high
GSM2235984	0.666667	1	6.36277	high
GSM2235837	9.41667	0	6.36866	high
GSM2235762	3.25	1	6.37108	high
GSM2235924	11.25	0	6.37108	high
GSM2235934	3.91667	0	6.3721	high
GSM2235973	5.16667	0	6.37262	high
GSM2235899	2.83333	1	6.37424	high
GSM2235741	10.5833	0	6.38163	high
GSM2235993	10.5	0	6.38321	high
GSM2235775	10	0	6.38602	high
GSM2235987	2.91667	0	6.38898	high
GSM2235700	9.75	0	6.38918	high
GSM2235713	9.66667	1	6.39055	high
GSM2235801	9.41667	0	6.39066	high
GSM2235776	1.66667	1	6.39194	high
GSM2235922	11.5	0	6.40161	high
GSM2235823	0.75	1	6.40773	high
GSM2235954	12.4167	0	6.40818	high
GSM2235901	4.83333	1	6.40941	high
GSM2235786	9	0	6.41261	high
GSM2235611	0.666667	1	6.41406	high
GSM2235807	2.75	1	6.41462	high
GSM2235737	3.75	1	6.41462	high
GSM2235942	3.5	0	6.41751	high
GSM2235626	6.41667	0	6.41807	high
GSM2235635	6	0	6.42018	high
GSM2235794	10.0833	0	6.42287	high
GSM2235903	10.9167	0	6.42402	high
GSM2235943	10.5833	0	6.42482	high
GSM2236080	1.16667	1	6.42504	high
GSM2235818	0.833333	1	6.42792	high
GSM2235722	3	1	6.42837	high
GSM2235698	1.91667	1	6.42882	high
GSM2236002	10.75	0	6.43787	high
GSM2235716	8.66667	1	6.43976	high
GSM2235847	9.25	0	6.44272	high
GSM2235885	10.3333	0	6.44411	high
GSM2235621	2.75	1	6.44519	high
GSM2235819	1.75	1	6.44777	high
GSM2235864	1	1	6.45046	high
GSM2235750	0.583333	1	6.45309	high
GSM2235708	9.08333	0	6.45465	high
GSM2235866	10.75	0	6.45967	high
GSM2235597	7	0	6.46198	high
GSM2235599	6.66667	0	6.46394	high
GSM2235884	10.5	0	6.4655	high
GSM2235596	6.25	0	6.46746	high
GSM2235589	6.41667	0	6.46995	high
GSM2236008	2.5	1	6.47417	high
GSM2235756	11.6667	0	6.47501	high
GSM2236000	10.1667	0	6.47514	high
GSM2235862	7.08333	1	6.47638	high
GSM2235634	6.16667	0	6.48162	high
GSM2235773	1.41667	1	6.48583	high
GSM2235772	5	1	6.48707	high
GSM2235939	3.75	0	6.48882	high
GSM2235863	11.0833	0	6.49225	high
GSM2235778	1.91667	1	6.49695	high
GSM2235812	2.83333	1	6.49825	high
GSM2235814	9.41667	0	6.4998	high
GSM2235988	5.83333	0	6.50188	high
GSM2235780	0	1	6.50251	high
GSM2235938	7.66667	0	6.50708	high
GSM2236091	10.25	1	6.5139	high
GSM2235703	3.58333	1	6.52193	high
GSM2235926	11.6667	0	6.52327	high
GSM2235767	1.5	1	6.5253	high
GSM2235949	11	0	6.53745	high
GSM2235631	5.75	0	6.53811	high
GSM2236086	12.4167	0	6.54058	high
GSM2235761	11.1667	0	6.54356	high
GSM2235561	7.08333	0	6.54659	high
GSM2235632	6.33333	0	6.55632	high
GSM2236039	3.5	0	6.55956	high
GSM2235615	6.41667	0	6.56197	high
GSM2235598	1.75	1	6.56212	high
GSM2235900	10.5833	0	6.56609	high
GSM2235848	3.33333	1	6.56725	high
GSM2235605	5.58333	1	6.57133	high
GSM2236038	3.33333	0	6.57221	high
GSM2236062	10.75	0	6.57564	high
GSM2235816	0.333333	1	6.58233	high
GSM2235982	3.08333	0	6.59083	high
GSM2235953	0.833333	1	6.60026	high
GSM2235811	1	1	6.60615	high
GSM2235558	2	1	6.61445	high
GSM2235827	3.58333	1	6.62356	high
GSM2235909	1.5	1	6.6252	high
GSM2236050	8.41667	0	6.63688	high
GSM2235905	0.166667	1	6.64026	high
GSM2235580	2.08333	1	6.64312	high
GSM2235958	12.6667	0	6.65632	high
GSM2235717	0.25	1	6.70702	high
GSM2235817	4.58333	1	6.71207	high
GSM2235600	6.16667	0	6.71678	high
GSM2235630	5.83333	0	6.72359	high
GSM2235879	0.5	1	6.7298	high
GSM2235805	0.416667	1	6.7325	high
GSM2235944	10.5	0	6.7377	high
GSM2235945	3.08333	1	6.73909	high
GSM2235800	9.5	0	6.73979	high
GSM2236073	1.83333	1	6.74325	high
GSM2235783	6.25	1	6.75085	high
GSM2235825	1.91667	1	6.75604	high
GSM2236037	3.41667	0	6.7686	high
GSM2236013	4.41667	1	6.7716	high
GSM2236025	3.25	1	6.78665	high
GSM2235935	1.58333	1	6.79024	high
GSM2235606	6.08333	0	6.7911	high
GSM2235732	9.83333	0	6.79197	high
GSM2235975	5.08333	0	6.7971	high
GSM2235961	11.75	0	6.79908	high
GSM2236041	3.41667	0	6.80251	high
GSM2235992	10.6667	0	6.80504	high
GSM2236068	3.5	1	6.80558	high
GSM2235573	6.83333	0	6.82027	high
GSM2235765	11.5	0	6.821	high
GSM2235559	4.91667	1	6.82243	high
GSM2236005	0.75	1	6.82261	high
GSM2235729	0.416667	1	6.82352	high
GSM2236059	11.4167	0	6.83105	high
GSM2235824	6.58333	1	6.83522	high
GSM2236009	2.25	1	6.83691	high
GSM2235629	3	1	6.83691	high
GSM2235625	5.83333	0	6.8479	high
GSM2236031	11.1667	0	6.84923	high
GSM2235908	10.25	0	6.8591	high
GSM2236021	4.25	1	6.86306	high
GSM2235970	1.5	1	6.86437	high
GSM2235633	1.41667	1	6.86924	high
GSM2235936	3.5	0	6.87424	high
GSM2235867	10.4167	0	6.87444	high
GSM2235791	2.08333	1	6.87794	high
GSM2236001	10.3333	0	6.87966	high
GSM2235883	1.58333	1	6.8839	high
GSM2235882	1.08333	1	6.88618	high
GSM2235748	0.166667	1	6.90146	high
GSM2235755	7.25	1	6.90366	high
GSM2235841	1.33333	1	6.90822	high
GSM2235612	2.41667	1	6.90897	high
GSM2235950	10.6667	0	6.92346	high
GSM2236063	10.9167	0	6.92823	high
GSM2235609	0.666667	1	6.94336	high
GSM2236057	3.08333	1	6.95397	high
GSM2235964	1.83333	1	6.95703	high
GSM2235601	6.16667	0	6.96291	high
GSM2235880	1.41667	1	6.9699	high
GSM2235702	1.5	1	6.9783	high
GSM2235744	4.08333	1	6.98813	high
GSM2235795	10.0833	0	6.98959	high
GSM2235628	6.16667	0	6.99108	high
GSM2235724	0.833333	1	7.00324	high
GSM2236003	10.5	0	7.00428	high
GSM2235577	1.58333	1	7.01333	high
GSM2235570	6.75	0	7.01888	high
GSM2235588	4.25	1	7.01909	high
GSM2235699	1.91667	1	7.02246	high
GSM2235710	1.08333	1	7.03182	high
GSM2235726	0.0833333	1	7.04186	high
GSM2235948	11	0	7.04271	high
GSM2235977	0.583333	1	7.04869	high
GSM2235760	1.66667	1	7.04994	high
GSM2235951	0.416667	1	7.07231	high
GSM2235566	0.916667	1	7.08515	high
GSM2235966	2.75	0	7.10313	high
GSM2236043	3.33333	0	7.10556	high
GSM2235728	2.91667	1	7.13232	high
GSM2235572	7.16667	0	7.14487	high
GSM2235983	3.16667	0	7.15816	high
GSM2235940	2.75	1	7.16569	high
GSM2235745	8.83333	0	7.16725	high
GSM2235929	5	1	7.16815	high
GSM2236061	10.75	0	7.18143	high
GSM2235557	1.91667	1	7.1819	high
GSM2235636	5.75	0	7.20998	high
GSM2235793	7.25	1	7.21113	high
GSM2236075	3.25	1	7.21255	high
GSM2235560	1	1	7.21741	high
GSM2235979	3.5	0	7.25753	high
GSM2236054	6.58333	1	7.29918	high
GSM2235902	2.83333	1	7.30613	high
GSM2235978	2.83333	0	7.35508	high
GSM2235610	1.91667	1	7.3726	high
GSM2235933	3.41667	0	7.38919	high
GSM2235567	3.58333	1	7.489	high
GSM2235565	5.41667	1	7.49272	high
GSM2235607	0.5	1	7.6193	high
GSM2236060	3.08333	1	7.63834	high

## Sheet: TCGA-STAD clinical data
Id	futime	fustat	Age	Gender	Grade	Stage	T	M	N
TCGA-VQ-A8PS	406	1	76	MALE	G2	Stage IIIA	T3	M0	N1
TCGA-CG-4301	92	0	75	FEMALE	G3	Stage IV	T4	M1	N1
TCGA-R5-A7ZR	185	1	70	FEMALE	G2	Stage III	T3	M0	NX
TCGA-VQ-AA64	560	1	68	MALE	G2	Stage IIIB	T3	M0	N2
TCGA-BR-8686	635	1	69	MALE	G3	Stage IIIB	T4b	M0	N1
TCGA-B7-A5TJ	335	0	74	MALE	G1	Stage IIB	T4a	M0	NX
TCGA-BR-A4QL	491	1	75	FEMALE	G2	Stage IIIB	T3	M0	N3a
TCGA-D7-6817	389	0	63	MALE	G3	Stage IIIA	T2b	M0	N3
TCGA-BR-4366	0	0	87	MALE	G2	unknow	TX	M0	NX
TCGA-MX-A5UG	113	1	78	MALE	G3	Stage IIIA	T3	M0	N1
TCGA-IN-A6RJ	379	0	64	MALE	G3	Stage IA	T1b	M0	N0
TCGA-CG-4475	699	0	76	MALE	G3	Stage IIB	T3	M0	N1
TCGA-BR-8591	856	0	79	MALE	G3	Stage IIIC	T4a	M0	N3a
TCGA-BR-8676	229	0	59	MALE	G3	Stage IIIB	T3	M0	N3a
TCGA-D7-A4YV	180	0	69	FEMALE	G3	Stage IIB	T3	M0	N1
TCGA-BR-8285	17	1	57	FEMALE	G3	Stage IIIC	T4a	M0	N3a
TCGA-CD-5798	408	0	82	MALE	G2	Stage II	T3	M0	N0
TCGA-FP-A4BF	168	1	68	MALE	G3	Stage IIIA	T3	M0	N2
TCGA-VQ-A91D	356	1	70	MALE	G2	Stage IIIC	T4b	M0	N2
TCGA-BR-4184	212	1	70	MALE	G2	Stage IIIA	T3	MX	N1
TCGA-BR-8380	21	0	55	MALE	G3	Stage IIIC	T4a	M0	N3a
TCGA-VQ-A8PH	389	1	62	MALE	G2	Stage IIIB	T3	M0	N3
TCGA-BR-8382	762	1	67	FEMALE	G3	Stage IIIC	T4b	M0	N3a
TCGA-FP-A9TM	189	0	77	MALE	G2	unknow	T1b	M0	N1
TCGA-BR-8058	1133	0	53	FEMALE	G3	Stage IIIB	T4a	M0	N2
TCGA-CG-4469	215	1	70	MALE	G3	Stage IV	T3	M0	N3
TCGA-BR-6801	1223	0	70	MALE	G2	Stage IIA	T3	M0	N0
TCGA-BR-8361	946	0	71	FEMALE	G3	Stage IIIC	T4b	M0	N2
TCGA-D7-6522	566	0	58	MALE	G3	Stage IB	T2	M0	N0
TCGA-BR-4256	284	1	80	MALE	G2	unknow	TX	M0	N1
TCGA-VQ-A91Z	1690	0	67	FEMALE	G2	Stage IIIA	T3	M0	N1
TCGA-VQ-A91V	1297	0	58	MALE	G2	Stage IIIA	T3	M0	N2
TCGA-CG-4455	366	0	72	MALE	G3	Stage II	T2b	M0	N1
TCGA-CD-8529	374	0	65	MALE	G2	Stage IV	T4	M1	N0
TCGA-D7-A74A	607	0	61	FEMALE	G2	Stage IIIA	T3	M0	N2
TCGA-CG-4443	912	0	68	MALE	G2	Stage IA	T1	M0	N0
TCGA-BR-4368	0	0	78	FEMALE	G3	Stage IV	T4	M0	N2
TCGA-SW-A7EA	579	0	61	FEMALE	GX	Stage IB	T2	M0	N0
TCGA-D7-6518	582	0	75	MALE	G3	Stage IIIA	T2	M0	N3
TCGA-CG-5725	457	1	72	MALE	G3	Stage IB	T2	M0	N0
TCGA-VQ-A8PK	543	1	58	MALE	G2	Stage IIIB	T3	M0	N3a
TCGA-BR-A4PE	621	0	68	FEMALE	G2	Stage IB	T2	M0	N0
TCGA-BR-6563	1190	0	60	MALE	G3	Stage IIB	T3	M0	N1
TCGA-D7-A6EX	344	0	72	FEMALE	G3	Stage IIIA	T3	M0	N2
TCGA-VQ-A91S	1000	0	63	MALE	GX	Stage IIIB	T4b	M0	N1
TCGA-BR-4370	0	0	74	FEMALE	G2	unknow	TX	M0	NX
TCGA-BR-8373	450	0	65	FEMALE	G2	Stage IIIA	T4a	M0	N1
TCGA-CG-5718	1095	1	78	FEMALE	G2	Stage II	T2b	M0	N1
TCGA-RD-A7BS	336	1	46	MALE	G3	Stage IIIA	T3	M0	N1
TCGA-D7-A6EY	348	1	72	FEMALE	G3	Stage IIIB	T3	M0	N3a
TCGA-VQ-AA68	1328	0	52	FEMALE	G2	Stage IIIC	T4a	M0	N3
TCGA-BR-6802	940	0	65	MALE	G3	Stage IIIA	T3	M0	N2
TCGA-CG-4460	669	1	66	FEMALE	G2	Stage IV	T4	M1	N1
TCGA-CG-4474	0	0	67	FEMALE	G3	Stage IV	T4a	M1	N2
TCGA-VQ-A8DU	166	1	63	MALE	G2	Stage IIIA	T3	M0	N2
TCGA-BR-4267	188	1	51	MALE	G2	Stage IB	T2a	M0	N0
TCGA-RD-A8N4	2171	0	58	FEMALE	G3	Stage IIIA	T3	M0	N1
TCGA-VQ-A91E	664	0	67	FEMALE	G3	Stage IIIB	T4b	M0	N0
TCGA-IN-AB1X	411	0	78	FEMALE	G3	Stage IIA	T3	M0	N0
TCGA-BR-8381	224	0	51	MALE	G3	Stage IIB	T3	M0	N1
TCGA-HU-A4GH	358	0	75	MALE	G2	Stage IA	T1b	M0	N0
TCGA-CG-5730	122	0	80	FEMALE	G2	Stage IV	T2	M1	N1
TCGA-BR-8286	895	0	49	MALE	G3	Stage II	T3	M0	N0
TCGA-BR-A4PF	35	0	72	MALE	G3	Stage IIIB	T4a	M0	N2
TCGA-HU-A4H8	270	0	77	MALE	G2	Stage IB	T1b	M0	N1
TCGA-CD-8524	388	0	61	FEMALE	G3	Stage II	T3	M0	N0
TCGA-IN-A6RP	196	0	63	MALE	G3	unknow	T1b	M0	N3
TCGA-B7-A5TK	288	0	51	MALE	G3	Stage IIIA	T4	M0	unknow
TCGA-CG-4438	1645	0	56	MALE	G3	Stage IV	T4	M0	N2
TCGA-VQ-A8PP	712	1	76	MALE	G2	Stage IV	T4	M0	N1
TCGA-BR-4371	0	0	71	FEMALE	G1	unknow	T2	M0	NX
TCGA-BR-8296	474	1	58	FEMALE	G3	Stage IIIC	T4b	M0	N2
TCGA-VQ-A928	174	1	49	MALE	G2	Stage IV	T3	M0	N3
TCGA-D7-8574	523	0	72	MALE	G3	Stage IIIA	T2	M0	N3a
TCGA-HU-A4H3	882	0	56	FEMALE	G3	Stage IIIC	T4a	M0	N3b
TCGA-D7-6524	543	0	53	MALE	G3	Stage II	T2	M0	N1
TCGA-MX-A666	427	0	61	MALE	G2	Stage IIA	T2	MX	NX
TCGA-BR-8592	191	1	63	FEMALE	G3	Stage IIIB	T4b	M0	N1
TCGA-BR-6455	422	1	59	MALE	G3	Stage IIB	T3	M0	N1
TCGA-BR-6707	605	1	75	MALE	G3	Stage IIA	T3	M0	N0
TCGA-BR-A4PD	628	0	72	FEMALE	G3	Stage IIB	T4a	M0	N0
TCGA-D7-A74B	217	1	52	FEMALE	G3	Stage IIIB	T3	M0	N3
TCGA-CD-8533	468	0	48	MALE	G3	Stage II	T3	M0	N0
TCGA-CD-A4MI	358	1	62	MALE	G1	Stage IIIA	T3	M0	N1
TCGA-CG-4465	274	1	69	FEMALE	G3	Stage IV	T4	M1	N3
TCGA-CD-5803	341	1	78	FEMALE	G3	Stage II	T3	M0	N0
TCGA-D7-A6F0	678	0	79	FEMALE	G3	Stage IB	T2	M0	N0
TCGA-BR-7197	280	0	69	MALE	GX	Stage II	T3	M0	N0
TCGA-BR-8384	113	0	69	MALE	G3	Stage IIIC	T4b	M0	N2
TCGA-F1-6874	440	0	79	MALE	G3	Stage IB	T2	M0	N0
TCGA-CG-4449	580	0	81	MALE	G2	Stage II	T2	M0	N1
TCGA-D7-6527	312	1	62	MALE	G2	Stage II	T2	M0	N1
TCGA-VQ-AA6D	521	0	52	FEMALE	G2	Stage IIIA	T4a	M0	N1
TCGA-CG-4477	942	0	58	FEMALE	G3	Stage IB	T2a	M0	N0
TCGA-D7-6525	406	1	58	MALE	G3	Stage IIIA	T2	M0	N2
TCGA-IN-8462	572	0	80	MALE	G2	Stage IIB	T2	M0	N1
TCGA-CD-A486	192	1	68	MALE	G2	Stage IIA	T3	M0	N0
TCGA-HU-8610	23	0	75	MALE	G2	Stage IA	T1b	M0	N0
TCGA-BR-4363	0	0	60	FEMALE	G3	unknow	T3	MX	NX
TCGA-VQ-A923	0	1	90	MALE	G3	Stage IIIA	T3	M0	N1
TCGA-HU-A4GU	200	0	73	MALE	G3	Stage IIB	T3	M0	N1
TCGA-CG-5727	2405	0	66	MALE	G3	Stage II	T3	M0	N0
TCGA-RD-A8N5	1747	1	78	MALE	G2	Stage IIIA	T3	M0	N1
TCGA-B7-5816	812	0	51	FEMALE	G3	Stage IIB	T4a	M0	N0
TCGA-IN-7806	1106	0	50	MALE	G3	Stage IIB	T3	M0	N1
TCGA-CG-4466	577	0	81	FEMALE	G2	Stage IB	T2a	M0	N0
TCGA-HU-8249	881	0	76	MALE	G2	Stage IIIA	T3	M0	N2
TCGA-HU-A4GF	785	0	69	MALE	G2	Stage IIA	T3	M0	N0
TCGA-D7-A747	255	1	57	MALE	G3	Stage IIB	T3	M0	N1
TCGA-HU-A4H4	725	0	53	FEMALE	G3	Stage IIB	T2	M0	N2
TCGA-CG-4472	365	0	49	MALE	G3	Stage IV	T4	M0	N1
TCGA-VQ-A8PB	1043	1	65	FEMALE	G2	Stage II	T3	M0	N0
TCGA-R5-A7O7	1389	0	51	MALE	G2	Stage IV	T3	M1	N1
TCGA-BR-8363	8	1	73	FEMALE	G3	Stage IB	T2	M0	N0
TCGA-CD-8536	378	0	74	MALE	G3	Stage II	T3	M0	N0
TCGA-BR-7715	1023	0	65	MALE	G2	Stage IIA	T3	M0	N0
TCGA-BR-4361	0	0	66	FEMALE	G3	Stage IIIA	T4	M0	N0
TCGA-BR-4367	0	0	78	MALE	G3	unknow	TX	M0	N1
TCGA-BR-8483	164	0	59	MALE	G2	Stage IIIA	T3	M0	N2
TCGA-CG-4476	0	0	69	MALE	G3	Stage IIIC	T4b	M0	N3a
TCGA-VQ-A91N	570	1	59	FEMALE	G2	Stage IV	T4	M0	N3
TCGA-BR-4188	226	1	53	FEMALE	G3	unknow	TX	M0	N1
TCGA-CG-5726	881	1	73	MALE	G2	Stage IA	T1	M0	N0
TCGA-BR-7704	1072	0	69	FEMALE	G3	Stage II	T3	M0	N0
TCGA-D7-8573	593	0	57	MALE	G3	Stage IIA	T3	M0	N0
TCGA-HU-A4HD	1016	0	73	MALE	G2	Stage IIIA	T3	M0	N2
TCGA-FP-7829	594	0	69	MALE	G2	Stage IIB	T3	M0	N1
TCGA-BR-8680	972	0	45	MALE	G2	Stage IV	T4b	M1	N2
TCGA-D7-A6EV	342	0	71	FEMALE	G3	Stage IIB	T2	M0	N2
TCGA-IN-A6RI	559	0	45	MALE	G2	Stage I	T1b	M0	N0
TCGA-BR-6706	549	1	63	MALE	G3	Stage IIIA	T3	M0	N1
TCGA-HF-7132	2351	0	unknow	MALE	G2	Stage II	T2b	M0	N1
TCGA-BR-8364	675	0	42	FEMALE	G3	Stage IIIC	T4b	M0	N2
TCGA-VQ-A927	200	1	81	MALE	G1	Stage IIIB	T3	M0	N3
TCGA-BR-8485	280	0	68	FEMALE	G3	Stage IIIC	T4	M0	N3a
TCGA-VQ-A94T	342	1	73	MALE	G3	Stage IIIB	T3	M0	N2
TCGA-BR-A4J4	16	0	39	MALE	G3	Stage IIIB	T4a	M0	N2
TCGA-BR-8284	245	1	72	FEMALE	G3	Stage IIIC	T4a	M0	N3a
TCGA-BR-7717	552	1	63	MALE	G2	Stage IV	T4	M0	N1
TCGA-BR-8077	21	0	58	FEMALE	G2	Stage IIIB	T4b	M0	N1
TCGA-BR-6458	588	1	57	FEMALE	G3	Stage IIB	T3	M0	N1
TCGA-BR-A4J7	989	0	49	MALE	G3	Stage IIB	T4a	M0	NX
TCGA-VQ-AA6G	792	1	68	MALE	G2	Stage IIA	T3	M0	N0
TCGA-BR-8060	348	1	75	FEMALE	G3	Stage IIB	T2	M0	N2
TCGA-BR-A4J1	22	1	63	MALE	G3	Stage IIIA	T4a	M0	N1
TCGA-HU-8602	679	0	58	FEMALE	G3	Stage IIB	T4a	M0	N0
TCGA-CG-5722	30	0	67	FEMALE	G3	Stage IV	T3	M1	N2
TCGA-KB-A6F7	1935	0	54	FEMALE	G3	Stage IB	T1	M0	N1
TCGA-KB-A6F5	169	0	73	MALE	G3	Stage IIIA	T3	M0	N2
TCGA-CG-4300	609	1	79	MALE	G2	Stage IIIB	T3	M0	N2
TCGA-HU-A4GY	8	0	76	FEMALE	G3	Stage IIIA	T4	M0	N1
TCGA-BR-A4J9	14	0	55	MALE	G3	Stage IIA	T3	M0	N0
TCGA-HU-A4GQ	3	1	71	MALE	G2	Stage IIIC	T4b	M0	N2
TCGA-IN-A7NU	356	0	69	MALE	G3	Stage IIIB	T3	M0	N3
TCGA-RD-A7C1	507	1	82	MALE	G3	Stage IB	T2	M0	N0
TCGA-IN-A6RN	594	0	72	FEMALE	G2	Stage IIA	T1b	M0	N2
TCGA-RD-A8MW	1153	1	72	MALE	G3	Stage IIIB	T3	M0	N2
TCGA-BR-8367	801	1	55	MALE	G3	Stage IIIB	T3	M0	N3a
TCGA-CD-5799	396	0	45	MALE	G3	Stage II	T2	M0	N1
TCGA-VQ-A8PM	57	1	56	MALE	G3	Stage IV	T4	M0	N3
TCGA-VQ-A922	275	1	70	MALE	G2	Stage IV	T4	M0	N1
TCGA-BR-8362	398	1	65	MALE	G3	Stage IIIC	T4b	M0	N3a
TCGA-BR-8370	101	0	64	MALE	G3	Stage IIIB	T3	M0	N3a
TCGA-BR-6452	1055	0	78	FEMALE	G3	Stage IIA	T3	M0	N0
TCGA-HU-A4GJ	650	0	60	FEMALE	G3	Stage IIIC	T4	M0	N3a
TCGA-BR-7851	378	0	74	MALE	G3	Stage IIB	T4a	M0	N0
TCGA-FP-7735	106	1	77	MALE	G2	Stage IB	T2	MX	N0
TCGA-HU-8245	552	0	72	MALE	G3	Stage IIA	T3	M0	N0
TCGA-CD-5801	401	1	69	MALE	G3	Stage IIIA	T3	M0	N1
TCGA-CG-5723	2496	0	83	MALE	G3	Stage II	T2	M0	N1
TCGA-BR-A4IZ	273	1	45	FEMALE	G3	Stage IIIB	T4a	M0	N2
TCGA-CG-4441	426	1	83	MALE	G2	Stage IIIA	T2	M0	N2
TCGA-HU-A4GC	99	0	74	MALE	G3	Stage IIIB	T4a	M0	N2
TCGA-D7-A4YY	419	0	61	MALE	G3	Stage IIIB	T3	M0	N3a
TCGA-D7-A4Z0	449	0	60	FEMALE	G3	Stage IIB	T2	M0	N2
TCGA-D7-8570	752	0	44	MALE	G3	Stage IIIB	T3	M0	N3a
TCGA-VQ-A8PQ	476	1	50	FEMALE	G2	Stage IV	T4	M1	N1
TCGA-RD-A7BT	262	1	66	MALE	G3	Stage IV	T3	M0	N3
TCGA-CD-8535	390	0	59	MALE	G3	Stage IIIA	T3	M0	N1
TCGA-VQ-A8PU	832	1	72	FEMALE	G3	Stage IIIA	T4a	M0	N1
TCGA-VQ-A8P8	942	0	72	FEMALE	G2	Stage IIB	T4a	M0	N0
TCGA-HU-A4G3	170	0	54	MALE	G2	Stage IIB	T2	M0	N2
TCGA-BR-8687	250	1	67	FEMALE	G3	Stage IIIC	T4b	M0	N2
TCGA-HF-7133	1918	0	unknow	FEMALE	G2	Stage IV	T2b	M0	N3
TCGA-D7-A748	132	1	41	FEMALE	G3	Stage IV	T4a	M1	N3
TCGA-D7-5579	636	0	74	MALE	G3	Stage IIIA	T3	M0	N2
TCGA-BR-6564	794	1	46	FEMALE	G3	Stage IIIA	T3	M0	N2
TCGA-CG-4304		0	84	MALE	G2	Stage IB	T2a	M0	N0
TCGA-VQ-A8E0	562	1	68	MALE	G3	Stage IIIA	T3	M0	N2
TCGA-BR-8677	813	0	74	FEMALE	G3	Stage IIIB	T3	M0	N3a
TCGA-CD-5802	406	0	58	MALE	G2	Stage II	T3	M0	N0
TCGA-RD-A8N1	3519	0	70	MALE	G3	Stage IIIB	T3	M0	N2
TCGA-HU-A4GP	273	0	62	FEMALE	G2	Stage IIA	T2	M0	N1
TCGA-VQ-A94R	1294	1	63	MALE	G2	unknow	T4a	M0	N2
TCGA-BR-8080	292	1	72	FEMALE	G3	Stage IIIC	T4	M0	N3a
TCGA-BR-4369	0	0	75	MALE	G3	unknow	TX	M0	NX
TCGA-BR-A4J2	431	0	70	MALE	G3	Stage IIB	T4a	M0	N0
TCGA-BR-A4J5	862	0	56	MALE	G3	Stage IIIA	T4a	M0	N1
TCGA-CD-8528	375	0	43	FEMALE	G3	Stage IIIA	T4	M0	N0
TCGA-VQ-A94P	81	1	57	MALE	GX	unknow	T4	MX	NX
TCGA-BR-A4IY	392	0	58	MALE	G3	Stage IIB	T4a	M0	N0
TCGA-CG-5720	30	1	71	MALE	G3	Stage IB	T2	M0	N0
TCGA-MX-A663	300	1	66	MALE	G3	Stage IIA	T3	M0	N0
TCGA-CG-4442	0	0	85	MALE	G3	Stage IB	T2	M0	N0
TCGA-D7-6528	463	0	70	FEMALE	G2	Stage IB	T2	M0	N0
TCGA-VQ-A8E7	1138	0	59	MALE	G2	Stage IV	T3	M1	N1
TCGA-IN-AB1V	479	0	63	MALE	G2	Stage IA	T1b	M0	N0
TCGA-BR-4255	124	1	76	FEMALE	G3	Stage IIIA	T3	M0	N1
TCGA-BR-6453	485	0	54	MALE	G3	Stage IIA	T2	M0	N1
TCGA-BR-8295	67	1	60	FEMALE	G3	Stage IIB	T4a	M0	N0
TCGA-VQ-A91W	1851	0	30	MALE	G2	Stage IIIA	T3	M0	N1
TCGA-CD-8530	377	0	51	MALE	G3	Stage II	T3	M0	N0
TCGA-CG-4436	243	0	57	MALE	G2	Stage IB	T2	M0	N0
TCGA-HU-8244	742	0	77	FEMALE	G1	Stage IA	T1a	M0	N0
TCGA-CG-5728	579	0	88	FEMALE	G3	Stage IB	T2	M0	N0
TCGA-BR-4187	141	1	56	MALE	G3	unknow	TX	M0	NX
TCGA-D7-6520	573	0	53	MALE	G3	Stage IIIA	T2b	M0	N2
TCGA-KB-A93H	1145	0	79	FEMALE	G1	Stage IIB	T3	M0	N1
TCGA-IN-A6RS	383	0	76	MALE	G2	Stage IA	T1b	M0	N0
TCGA-VQ-AA6B	1002	0	48	MALE	G2	Stage IIIB	T3	M0	N2
TCGA-VQ-A94U	819	0	70	MALE	G3	Stage IIB	T4a	M0	N0
TCGA-BR-A452	229	1	57	MALE	G3	Stage IIIA	T4a	M0	N1
TCGA-VQ-AA6K	378	1	59	MALE	G3	Stage IIIC	T4a	M0	N3a
TCGA-VQ-A925	138	1	66	MALE	G2	Stage IIIA	T3	M0	N2
TCGA-BR-6852	1367	0	64	FEMALE	G3	Stage IIA	T3	M0	N0
TCGA-VQ-A8DZ	396	1	70	MALE	G3	Stage IV	T4	M1	N3
TCGA-RD-A8N0	1236	0	53	FEMALE	G3	Stage IIIB	T3	M0	N2
TCGA-BR-8078	900	0	70	FEMALE	G3	Stage IIB	T4a	M0	N0
TCGA-CD-5800	400	0	51	FEMALE	G1	Stage II	T3	M0	N0
TCGA-CD-8531	383	0	66	FEMALE	G3	Stage IIIA	T3	M0	N1
TCGA-R5-A804	140	1	54	MALE	G3	Stage IV	T3	M1	N2
TCGA-KB-A93J	1124	0	78	MALE	G3	Stage II	T2b	M0	N1
TCGA-CG-4306	1	1	90	MALE	G3	Stage IV	T3	M1	N2
TCGA-D7-8572	511	0	57	MALE	G2	Stage IIB	T2	M0	N2
TCGA-CD-8534	367	0	41	MALE	G3	Stage II	T3	M0	N0
TCGA-R5-A7ZF	259	1	65	FEMALE	G2	Stage IV	T4a	M1	N1
TCGA-HF-7134	1588	0	unknow	MALE	G2	Stage IA	T1	M0	N0
TCGA-D7-5578	385	0	80	MALE	G3	Stage IIIA	T3	M0	N2
TCGA-VQ-A8PE	675	1	78	MALE	G3	Stage IIIB	T3	M0	N3a
TCGA-HU-A4GT	198	0	71	FEMALE	G3	Stage IIA	T3	M0	N0
TCGA-CG-5734	243	1	68	MALE	G3	Stage IIIA	T3	M0	N1
TCGA-VQ-A8DT	1484	0	43	MALE	G3	Stage IIIB	T3	M0	N3a
TCGA-FP-7916	428	1	77	MALE	G3	Stage IIIC	T4a	MX	N3a
TCGA-CD-A4MG	200	1	76	MALE	G3	Stage IIA	T3	M0	N0
TCGA-RD-A8N2	3540	0	59	FEMALE	G3	Stage IB	T2	M0	N0
TCGA-BR-A4CQ	1064	0	58	MALE	G3	Stage IIIA	T4a	M0	N1
TCGA-D7-6519	625	0	64	FEMALE	G3	unknow	T2	M0	N1
TCGA-CG-5732	2100	1	66	MALE	G2	Stage IV	T2	M0	N3
TCGA-CD-8527	218	1	72	FEMALE	G2	Stage II	T2	M0	N1
TCGA-BR-7703	1100	0	81	MALE	G2	Stage IA	T1b	M0	N0
TCGA-HF-A5NB	928	0	75	FEMALE	G3	Stage IIIC	T4a	M0	N3a
TCGA-HU-A4GD	692	0	56	MALE	G3	Stage IIB	T3	M0	N1
TCGA-RD-A8N9	1083	0	63	FEMALE	G3	Stage II	T2	M0	N1
TCGA-BR-6709	370	1	57	FEMALE	G3	Stage IIIB	T3	M0	N3a
TCGA-D7-6818	376	1	53	MALE	G3	Stage IIIA	T2	M0	N3
TCGA-CG-4444	1431	0	76	MALE	G3	Stage IIIA	T2b	M0	N2
TCGA-BR-8366	29	0	80	FEMALE	G3	Stage IIA	T3	M0	N0
TCGA-CD-A4MH	371	0	86	FEMALE	G2	Stage IIA	T3	M0	N0
TCGA-BR-8683	300	1	75	MALE	G3	Stage IIIB	T4a	M0	N2
TCGA-BR-8484	766	1	61	MALE	G2	Stage IIIA	T4a	M0	N1
TCGA-D7-8575	554	1	75	MALE	G3	Stage IIIA	T3	M0	N2
TCGA-BR-8679	0	0	63	FEMALE	G2	Stage IB	T2	M0	N0
TCGA-BR-8371	359	1	62	MALE	G3	Stage IIIB	T3	M0	N3a
TCGA-BR-4357	0	0	58	MALE	G2	unknow	T3	MX	NX
TCGA-CG-4437	245	0	83	MALE	G2	Stage II	T2	M0	N1
TCGA-BR-A4J8	411	0	71	FEMALE	G3	Stage IIIB	T3	M0	N3a
TCGA-FP-8099	519	0	79	MALE	G2	Stage IIA	T3	MX	N0
TCGA-RD-A8MV	3720	0	56	MALE	G3	Stage IIIB	T3	M0	N2
TCGA-BR-8486	0	0	90	FEMALE	G2	Stage IA	T1b	M0	N0
TCGA-BR-4253	124	1	80	FEMALE	G3	Stage IIIA	T3	M0	N1
TCGA-F1-6177	0	0	90	MALE	G2	Stage I	T1b	MX	N1
TCGA-D7-A6EZ	618	1	66	MALE	G3	Stage IIIA	T3	M0	N2
TCGA-VQ-A924	1686	1	69	MALE	G2	Stage II	T3	M0	N0
TCGA-BR-7723	874	1	59	MALE	G3	Stage IIIB	T3	M0	N3a
TCGA-VQ-AA69	864	0	35	MALE	G2	Stage IIIA	T3	M0	N2
TCGA-HU-A4H0	64	0	72	MALE	G3	Stage IIIC	T4a	M0	N3b
TCGA-BR-8291	607	1	61	MALE	GX	Stage IIB	T3	M0	N1
TCGA-CG-5717	212	1	58	MALE	G3	Stage II	T2b	M0	N1
TCGA-HU-A4G9	736	0	67	FEMALE	G2	Stage IA	T1a	M0	N0
TCGA-HF-7136		0	unknow	MALE	G2	Stage IIIA	T3	M0	N1
TCGA-HJ-7597	805	1	71	FEMALE	G3	Stage IB	T2b	MX	N0
TCGA-CD-5804	0	0	90	MALE	G2	unknow	T3	M0	N1
TCGA-BR-4201	940	1	66	FEMALE	G1	unknow	T2a	M0	NX
TCGA-BR-6454	0	0	58	MALE	G3	Stage IIA	T3	M0	N0
TCGA-3M-AB46	1765	0	70	MALE	G2	Stage IB	T2b	MX	N0
TCGA-CD-A48C	353	1	79	FEMALE	G3	Stage IIB	T3	M0	N1
TCGA-D7-6820	344	0	64	MALE	G2	Stage IIB	T2	M0	N1
TCGA-BR-A44U	422	1	70	MALE	G3	Stage IIIB	T3	M0	N3a
TCGA-BR-7196	666	0	64	MALE	G3	Stage IV	T3	M1	N3a
TCGA-FP-8210	153	1	48	MALE	G3	Stage IIIA	T3	M0	N1
TCGA-BR-8690	325	0	54	FEMALE	G2	Stage IIIB	T3	M0	N3a
TCGA-BR-8368	131	0	84	FEMALE	G3	Stage IB	T2	M0	N0
TCGA-CG-5716	0	0	86	MALE	G2	Stage IV	T4a	M1	N2
TCGA-BR-8081	981	0	71	FEMALE	G2	Stage IIB	T4a	M0	N0
TCGA-HU-A4GN	912	0	61	MALE	G2	Stage IIA	T2	M0	N1
TCGA-CD-A489	344	1	58	MALE	G3	Stage IIA	T3	M0	N0
TCGA-RD-A8N6	272	1	78	FEMALE	G3	Stage IIIA	T2	M0	N2
TCGA-BR-8289	81	1	57	MALE	G3	Stage IV	T4	M1	N3a
TCGA-RD-A8NB	513	1	80	FEMALE	G3	Stage IIIA	T3	M0	N1
TCGA-VQ-A8PJ	82	1	53	MALE	GX	Stage IV	T4	M1	N2
TCGA-D7-6526	523	0	67	FEMALE	G2	Stage IIIA	T3	M0	N2
TCGA-CG-5721	183	0	58	MALE	G3	Stage IV	T4	M0	N1
TCGA-BR-6710	273	0	41	MALE	G2	Stage IB	T2	M0	N0
TCGA-EQ-5647	19	1	86	FEMALE	G2	Stage IV	T4	M1	N3
TCGA-B7-A5TI	595	0	52	MALE	G3	Stage IIIC	T4	M0	N3
TCGA-FP-8209	1811	1	49	MALE	G3	Stage IB	T2a	M0	N0
TCGA-RD-A7BW	156	1	68	FEMALE	G3	Stage IB	T2	M0	N0
TCGA-R5-A7ZI	2267	0	44	FEMALE	G3	Stage IV	T4	M1	N1
TCGA-BR-4280	201	1	78	FEMALE	G2	Stage III	T2b	M0	N1
TCGA-HU-A4H2	394	0	58	FEMALE	G2	Stage IIIB	T3	M0	N3b
TCGA-HU-A4G6	738	0	74	MALE	G3	Stage IA	T1b	M0	N0
TCGA-IN-A6RO		1	70	MALE	G2	Stage IA	T1b	M0	N0
TCGA-CD-A48A	378	0	57	MALE	G2	Stage IIA	T3	M0	N0
TCGA-CD-8526	381	0	73	FEMALE	G3	Stage IIIA	T3	M0	N1
TCGA-FP-8211	413	0	62	MALE	G2	Stage IIB	T3	MX	N1
TCGA-BR-8369	427	0	76	FEMALE	G3	Stage IIIB	T3	M0	N3a
TCGA-ZA-A8F6	525	0	71	MALE	G2	Stage IB	T2	MX	N0
TCGA-CD-5813	377	1	60	MALE	G3	Stage II	T3	M0	N0
TCGA-EQ-8122	243	1	71	FEMALE	G3	Stage IIB	T3	MX	N1
TCGA-BR-4292	0	0	73	FEMALE	G1	unknow	T1	M0	NX
TCGA-R5-A805	281	1	71	MALE	G3	Stage IIIB	T3	M0	N2
TCGA-VQ-A91A	1200	0	67	MALE	G1	Stage IIIB	T3	M0	N3a
TCGA-VQ-A91Q	633	1	61	MALE	G3	Stage IV	T3	M0	N3
TCGA-BR-A4QM	156	0	65	MALE	G3	Stage IIIA	T3	M0	N2
TCGA-FP-A8CX	7	0	60	MALE	G3	Stage IIIC	T4b	MX	N3a
TCGA-BR-8487	34	0	64	FEMALE	G3	Stage IIA	T3	M0	N0
TCGA-HU-A4G2	739	0	45	MALE	G3	Stage IIB	T3	M0	N1
TCGA-IN-A6RL	406	1	84	MALE	G2	unknow	T2	M0	N1
TCGA-BR-7959	1010	0	59	MALE	G3	Stage IIIA	T4a	M0	N1
TCGA-D7-8578	643	0	72	MALE	G2	Stage IB	T2	M0	N0
TCGA-CG-5724	366	1	59	MALE	G3	Stage IV	T3	M1	N3
TCGA-F1-A448	647	0	70	MALE	G3	Stage IIIB	T3	M0	N3b
TCGA-BR-6456	526	1	74	FEMALE	G2	Stage IIB	T3	M0	N1
TCGA-CG-4462	0	1	72	FEMALE	G3	Stage IV	T3	M1	N3
TCGA-VQ-AA6F	1646	0	57	MALE	G2	Stage IIB	T3	M0	N1
TCGA-VQ-A8PY	436	1	47	FEMALE	G2	Stage IIIB	T3	M0	N2
TCGA-VQ-A91U	52	1	78	MALE	G2	Stage IIIA	T3	M0	N1
TCGA-D7-5577	782	1	53	FEMALE	G2	Stage IIIA	T2	M0	N3
TCGA-BR-8678	754	0	76	MALE	G2	Stage IB	T2	M0	N0
TCGA-D7-6822	375	0	77	MALE	G2	Stage IB	T2	M0	N0
TCGA-BR-A4CS	45	1	77	MALE	G3	Stage IIIC	T4b	M0	N3a
TCGA-BR-8588	389	0	55	FEMALE	G3	Stage IIB	T4a	M0	N0
TCGA-VQ-A8PD	496	1	69	MALE	G2	Stage IIIC	T4a	M0	N3
TCGA-FP-A4BE	337	0	55	MALE	G3	Stage IIA	T3	M0	N0
TCGA-D7-A6F2	476	0	62	MALE	G3	Stage IB	T2	M0	N0
TCGA-VQ-A8DL	28	1	69	FEMALE	G2	Stage IIA	T3	M0	N0
TCGA-HU-A4H6	644	0	72	FEMALE	G2	Stage IIIA	T3	M0	N2
TCGA-BR-4191	558	1	72	MALE	G2	unknow	TX	M0	N1
TCGA-BR-A4J6	20	0	69	FEMALE	G2	Stage IIA	T3	M0	N0
TCGA-IN-8663	103	1	68	MALE	G3	Stage IIB	T2	M0	N2
TCGA-VQ-A92D	2032	0	67	MALE	G2	Stage IB	T2b	M0	N0
TCGA-FP-8631	17	0	68	MALE	G2	Stage IIIA	T3	MX	N2
TCGA-IN-7808	105	1	59	MALE	G3	unknow	T3	M1	N3
TCGA-HU-A4H5	724	0	71	MALE	GX	Stage IB	T2	M0	N0
TCGA-D7-A4YT	434	0	56	MALE	G2	Stage IIIA	T2	M0	N3a
TCGA-SW-A7EB	176	0	45	MALE	G2	Stage IIIA	T3	M0	N2
TCGA-D7-8579	636	0	66	FEMALE	G2	Stage IIB	T2	M0	N2
TCGA-D7-A4YU	500	0	73	MALE	G3	Stage IIIB	T3	M0	N3a
TCGA-CD-A4MJ	384	0	60	MALE	G2	Stage IB	T2	M0	N0
TCGA-IN-A6RR	205	1	84	MALE	G3	unknow	T3	M0	N1
TCGA-VQ-A91X	289	1	74	MALE	G3	Stage IIIB	T3	M0	N2
TCGA-VQ-A8P5	235	1	67	MALE	G3	Stage IIA	T3	M0	N0
TCGA-BR-6566	997	0	64	FEMALE	G3	Stage IIA	T3	M0	N0
TCGA-BR-8372	951	0	63	MALE	G3	Stage IIIC	T4b	M0	N3a
TCGA-F1-A72C	346	0	68	MALE	G2	Stage IIA	T3	M0	N0
TCGA-CG-5719	31	0	54	FEMALE	G1	Stage IV	T4	M1	N0
TCGA-BR-A4QI	652	1	70	FEMALE	G3	Stage IIA	T3	M0	N0
TCGA-BR-8590	284	1	62	MALE	G3	Stage IIIC	T4b	M0	N2
TCGA-CG-4440	122	1	68	FEMALE	G3	Stage IV	T3	M1	N3
TCGA-BR-A4IU	838	0	34	FEMALE	G3	Stage IIIA	T4a	M0	N1
TCGA-VQ-A8E2	1319	0	57	MALE	G2	Stage IIIB	T3	M0	N2
TCGA-VQ-AA6A	1184	0	56	MALE	G2	Stage IIIC	T4	M0	N3a
TCGA-BR-6705	779	1	68	FEMALE	G3	Stage IIIB	T3	M0	N3a
TCGA-BR-8059	439	1	72	MALE	G3	Stage III	T4	M0	N1
TCGA-CD-8532	354	1	52	MALE	G2	Stage II	T3	M0	N0
TCGA-BR-7707	1090	0	69	FEMALE	G3	Stage IB	T2	M0	N0
TCGA-VQ-A8PT	900	0	65	MALE	G3	Stage IIIB	T4b	M0	N0
TCGA-BR-A4CR	0	0	70	FEMALE	G3	Stage IIIC	T4b	M0	N3a
TCGA-HU-8243	180	1	66	MALE	G2	Stage IIIC	T4a	M0	N3b
TCGA-CG-5733	641	1	83	FEMALE	G3	Stage IIIA	T2	M0	N2
TCGA-D7-8576	446	1	54	FEMALE	G3	Stage IIIB	T3	M0	N3a
TCGA-VQ-A8E3	661	1	79	MALE	G3	Stage IIA	T3	M0	N0
TCGA-BR-A4IV	869	1	47	MALE	G3	Stage IIIB	T4a	M0	N2
TCGA-D7-6815	486	0	70	FEMALE	G2	Stage IIB	T2	M0	N2
TCGA-VQ-A91K	1862	0	69	MALE	G2	Stage IIIA	T3	M0	N1
TCGA-VQ-A8PX	1964	0	51	MALE	G2	Stage IA	T1	M0	N0
TCGA-BR-A453	185	1	51	MALE	G3	Stage IV	T4a	M1	N3a
TCGA-BR-8365	533	1	70	FEMALE	G3	Stage IIA	T3	M0	N0
TCGA-HU-8238	46	0	56	MALE	G2	unknow	T3	M0	unknow
TCGA-BR-8589	825	0	56	MALE	G3	Stage IIIB	T4b	M0	N1
TCGA-BR-4183	201	1	55	FEMALE	G3	Stage IIIA	T3	M0	N1
TCGA-BR-7722	466	1	62	MALE	G3	Stage IIB	T3	M0	N1
TCGA-B7-A5TN	287	0	60	MALE	G2	Stage IIB	T4a	M0	NX
TCGA-BR-6457	416	0	69	MALE	G3	Stage IIA	T3	M0	N0
TCGA-BR-4257	294	1	79	FEMALE	G2	unknow	TX	M0	NX
TCGA-BR-8360	188	0	66	MALE	G2	Stage IIA	T3	M0	N0
TCGA-KB-A93G	613	0	68	MALE	G1	Stage IB	T2	M0	N0
TCGA-IN-A7NR	198	0	64	FEMALE	G3	Stage IV	T3	M1	N3
TCGA-BR-7716	1210	0	62	FEMALE	G2	Stage IIB	T3	M0	N1
TCGA-HF-7131		0	unknow	FEMALE	G2	Stage IB	T2b	MX	N0
TCGA-EQ-A4SO	494	0	70	MALE	G2	Stage IIIB	T4b	MX	N1
TCGA-D7-A6ET	804	0	76	MALE	G2	Stage IIIB	T3	M0	N3a
TCGA-HU-8604	694	0	82	FEMALE	G2	Stage IIA	T3	M0	N0
TCGA-VQ-A8P2	1160	0	68	MALE	G2	Stage IIIA	T4a	M0	N1
TCGA-VQ-A94O	640	1	74	MALE	G2	Stage IIIC	T4a	M0	N3
TCGA-HU-A4GX	616	0	70	FEMALE	G3	Stage IIIC	T4b	M0	N2
TCGA-VQ-A8P3	1132	0	72	MALE	G2	Stage IIIA	T4	M0	N1
TCGA-B7-5818	356	0	62	MALE	G3	Stage IB	T2	M0	N0
TCGA-BR-4362	0	0	74	FEMALE	G3	unknow	TX	M0	N1
TCGA-IP-7968	77	0	74	MALE	G2	Stage IIIB	T3	MX	N2
TCGA-3M-AB47		1	51	MALE	G3	Stage IIIB	T3	MX	N2
TCGA-VQ-A8PO	282	1	74	MALE	G3	Stage IIB	T4a	M0	N0
TCGA-BR-8682	991	0	52	MALE	G3	Stage IIB	T4a	M0	N0
TCGA-ZQ-A9CR	24	1	79	FEMALE	G3	Stage IIIC	T4a	MX	N3
TCGA-VQ-A8PZ	2233	0	56	FEMALE	G3	Stage II	T3	M0	N0
TCGA-BR-7958	899	0	60	MALE	G3	Stage IIIB	T4b	M0	N0
TCGA-BR-A44T	1038	0	53	FEMALE	G3	Stage IIA	T3	M0	N0
TCGA-BR-6565	279	1	67	MALE	G2	Stage IIB	T4a	M0	N0
TCGA-F1-6875	2197	1	79	MALE	G2	Stage IA	T2	M0	N0
TCGA-VQ-AA6I	491	1	68	MALE	G3	Stage IIIB	T3	M0	N3
TCGA-VQ-A8DV	403	1	48	MALE	G2	Stage IB	T2	M0	N0
TCGA-VQ-A8PC	1407	1	65	MALE	G3	Stage IIIA	T3	M0	N1
TCGA-BR-4294	0	0	65	MALE	G2	unknow	T2a	M0	NX
TCGA-HU-A4HB	477	1	68	MALE	G3	Stage IIB	T2	M0	N2
TCGA-BR-8297	225	0	58	MALE	GX	Stage IIIC	T4b	M0	N3a
TCGA-CD-A487	374	0	51	MALE	G3	Stage IIB	T3	M0	N1
TCGA-CD-8525	383	0	82	FEMALE	G3	Stage IIIA	T3	M0	N1
TCGA-HU-8608	641	0	70	MALE	G3	Stage IIIB	T4a	M0	N2
TCGA-D7-A4YX	1108	0	63	MALE	G3	Stage IIB	T3	M0	N1
TCGA-D7-6521	564	0	65	MALE	G3	unknow	T2b	M0	N2
TCGA-VQ-A91Y	296	1	67	MALE	G3	Stage IIIC	T4a	M0	N3b
TCGA-FP-7998	678	0	77	MALE	G3	Stage IIIC	T4a	MX	N3a
TCGA-BR-6803	949	0	54	FEMALE	G3	Stage IIA	T3	M0	N0
TCGA-BR-7901	105	1	74	MALE	G2	Stage IIB	T3	M0	N1
TCGA-BR-4279	291	1	43	MALE	G3	Stage II	T2a	M0	N1
TCGA-HU-A4G8	690	0	71	FEMALE	G3	Stage IIB	T3	M0	N1
TCGA-BR-7957	276	1	50	FEMALE	GX	Stage IV	T3	M1	N3a
TCGA-R5-A7ZE	554	1	66	FEMALE	G2	Stage IIIA	T3	M0	N2
TCGA-VQ-AA6J	838	0	75	MALE	G3	Stage IIIB	T4a	M0	N2
TCGA-CG-4305	485	0	69	MALE	G3	Stage II	T2a	M0	N1
TCGA-IN-A7NT	323	0	73	FEMALE	G3	Stage IIB	T3	M0	N1
TCGA-MX-A5UJ	600	0	86	FEMALE	G3	Stage IIIA	T3	M0	N2
TCGA-VQ-A8PF	76	1	76	MALE	G3	Stage IIIB	T3	M0	N3b
